# Supplementary material
Source: publisher figshare collection journal article supplement (https://gsajournals.figshare.com/ndownloader/files/17429030)
Supplement: Supplementary file 1 [file 17429030]

## Sheet: Main
Table S1. G-TRACE Expression Database (GED) Master Scoring Spreadsheet									Expressed in tissue (RFP or GFP; 1 = yes, 0 = no)				BRAIN EXPRESSION		Subscore Key: under CB, 2 = ventral nerve cord (VNC) only, 4 = defined areas or few lineages; under OL, 2 = undefinable parts either outer or inner optic anlage (OOA or IOZ), etc.												EYE DISC EXPRESSION		Subscore Key: under Ubiquitous, 2 = clonal; under PR, 2 = clonal, 3 = single/cluster of cells; under Eye disc, 2 = clonal												WING DISC EXPRESSION		Subscore Key: under Ubiquitous, 2 = clonal; under pouch, 2 = clonal, 3 = non-clonal, defined areas
													Central brain (CB)		Mushroom body (MB)		TypeII-like neurons		Surface Glia (SG)		Optic Lobe (OL)		Medula Primordia (MP)		Lobula Primordia (LOP)		Ubiquitous		Eye Disc		Photoreceptor (PR)		Eye Glia		Antenna		Arista		Peripodial Membrane (PM)		Ubiquitous		Notum		Hinge		Pouch		A/P or D/V boundary
Stock #	NP line	Gal4 cytolocation	Assoc. Gene 1	Assoc. Gene 1 FBgn	Assoc. Gene 2	Assoc. Gene 2 FBgn	Assoc. Gene 3	Assoc. Gene 3 FBgn	Brain	Eye	Wing	Lymph gland	RFP	GFP	RFP	GFP	RFP	GFP	RFP	GFP	RFP	GFP	RFP	GFP	RFP	GFP	RFP	GFP	RFP	GFP	RFP	GFP	RFP	GFP	RFP	GFP	RFP	GFP	RFP	GFP	RFP	GFP	RFP	GFP	RFP	GFP	RFP	GFP	RFP
103492	7	073E04	CG14059	FBgn0036690	CG7730	FBgn0036689	beg	FBgn0036691	1	1	1	0	1	1	1	1	0	0	0	0	1	1	0	0	0	0	0	0	0	0	0	2	0	0	0	2	0	2	0	0	0	0	0	1	1	1	1	2	0
103494	12	072D01	Mbs	FBgn0003691					1	0	0	1	0	0	0	0	0	0	1	1	0	0	0	0	0	0	0	0	0	0	0	0	0	0	0	0	0	0	0	0	0	0	0	0	0	0	0	0	0
103495	14	026C01	CG9486	FBgn0031791	Ddr	FBgn0053531			1	1	0	0	1	1	0	0	0	0	0	0	1	1	0	0	0	0	0	0	0	0	1	1	0	0	0	0	0	0	0	0	0	0	0	0	0	0	0	0	0
103496	21	091B02	fru	FBgn0004652					1	1	1	1	1	1	1	1	0	0	0	0	0	1	0	0	0	0	0	1	1	0	0	0	0	0	1	0	0	0	0	0	0	1	1	0	1	0	3	0	0
103497	22	021D02	cbt	FBgn0043364	ush	FBgn0003963	MED15	FBgn0027592	1	1	1	1	1	1	0	0	0	0	0	0	0	0	0	0	0	1	0	0	1	1	0	0	0	0	0	0	0	0	0	0	0	0	1	1	1	1	0	2	0
103498	29	040E04	CG42748	FBgn0261802	CycK	FBgn0025674	CG34137	FBgn0083973	1	1	1	1	0	0	0	0	0	0	1	1	0	1	0	0	0	0	0	2	1	0	0	0	0	0	1	0	1	0	0	0	0	1	1	0	1	0	3	0	0
103499	32	006C03	l(1)G0148	FBgn0028360					1	1	1	1	1	1	0	0	0	0	0	0	0	1	0	0	0	0	0	1	0	0	0	0	0	0	0	0	0	0	0	0	0	1	1	0	1	0	1	0	0
103500	35	042E04	Tsp42Ea	FBgn0029508					1	1	1	0	0	0	0	0	0	0	1	1	0	1	0	0	0	0	0	0	0	2	1	0	0	0	1	2	0	0	0	0	0	2	1	0	1	0	1	0	0
103501	36	015A11	CG13004	FBgn0030797					0	0	1	1	0	0	0	0	0	0	0	0	0	0	0	0	0	0	0	0	0	0	0	0	0	0	0	0	0	0	0	0	0	2	1	0	1	0	1	0	0
103502	37	093C02	SNF4Agamma	FBgn0025803					1	1	1	0	0	0	0	1	0	0	1	1	0	0	0	0	0	0	0	0	0	0	0	0	0	1	0	0	0	0	0	1	0	0	0	1	0	1	0	2	0
103503	39	046F07	Hr46	FBgn0000448					0	1	1	1	0	0	0	0	0	0	0	0	0	0	0	0	0	0	0	0	0	2	0	0	0	0	2	2	0	0	0	0	0	0	0	1	0	1	0	2	0
103504	42	001E01	CG11638	FBgn0040351					1	0	0	1	1	1	0	0	0	0	0	0	0	0	0	0	0	0	0	0	0	0	0	0	0	0	0	0	0	0	0	0	0	0	0	0	0	0	0	0	0
103505	45	045B03	CG8026	FBgn0033391					1	1	1	1	1	1	0	0	0	0	1	1	0	0	0	0	0	0	0	1	1	0	0	0	0	0	1	0	1	0	0	0	0	1	1	0	1	0	3	0	0
103506	49	060E04	Atf-2	FBgn0050420					1	1	1	1	0	0	0	0	0	0	1	0	0	0	0	0	0	0	0	0	0	0	0	0	0	1	1	1	1	1	0	0	0	0	0	1	0	0	2	2	0
103507	52	061B01	Pk61C	FBgn0020386	CG6845	FBgn0035099	CG7051	FBgn0035100	1	1	1	1	0	0	0	0	1	0	1	1	0	0	0	0	0	0	0	2	1	0	0	0	0	0	1	0	0	0	0	0	0	2	1	0	1	0	0	0	0
103508	53	Not Available							0	0	0	0	0	0	0	0	0	0	0	0	0	0	0	0	0	0	0	0	0	0	0	0	0	0	0	0	0	0	0	0	0	0	0	0	0	0	0	0	0
103509	54	085B07	CG11964	FBgn0037644					0	1	1	0	0	0	0	0	0	0	0	0	0	0	0	0	0	0	0	0	0	2	0	0	0	0	0	2	0	0	0	0	0	0	0	1	0	1	0	2	0
103510	55	007E01	CG1632	FBgn0030027					1	1	1	1	0	0	0	1	0	0	1	1	0	0	0	0	0	0	0	0	0	2	0	0	0	0	0	1	0	0	0	1	0	2	0	0	0	0	0	0	0
103512	57	066A06	CG33275	FBgn0035802					1	1	1	1	0	1	0	0	0	0	1	1	0	0	1	1	0	0	0	2	2	0	0	0	1	1	2	0	1	0	0	0	0	2	0	0	1	0	2	0	0
103513	58	047D05	BBS4	FBgn0033578					1	0	1	0	1	1	0	0	0	0	0	0	0	0	0	0	0	0	0	0	0	0	0	0	0	0	0	0	0	0	0	0	0	0	1	1	1	1	0	0	0
103514	71	091B05	Fray	FBgn0023083					1	1	1	1	0	0	0	0	0	0	1	1	0	0	0	0	0	0	0	0	0	0	0	2	0	0	0	2	0	0	0	0	0	0	0	1	0	1	0	0	0
103516	76	006E04	ogre	FBgn0004646	bou	FBgn0261284	inx7	FBgn0027106	1	1	1	0	0	0	0	0	0	0	1	1	0	0	0	0	0	0	0	1	1	0	1	0	0	0	1	0	1	0	0	0	1	1	0	0	0	0	3	0	0
103517	79	024A02	For	FBgn0000721					1	1	1	1	0	0	0	0	0	0	1	1	2	2	0	1	0	0	0	0	0	0	1	2	0	0	1	2	0	0	0	1	0	0	0	1	1	0	0	2	0
103518	80	047D06	shn	FBgn0003396					1	1	1	1	0	0	0	0	0	0	1	1	0	0	0	0	0	0	0	1	1	0	0	0	1	0	1	0	0	0	0	0	0	1	1	0	1	0	3	0	0
103519	96	061C09	CG13897	FBgn0035160	CG13896	FBgn0035159	emc	FBgn0000575	1	1	1	1	1	1	0	0	0	0	0	0	1	1	0	0	0	0	0	2	1	0	1	0	0	0	2	0	0	0	1	0	0	2	1	0	1	0	1	0	0
103520	97	079C02	olf413	FBgn0037153	CG15374	FBgn0037152	msopa	FBgn0004414	1	1	1	1	1	1	1	1	0	0	0	0	0	1	0	0	0	0	0	0	1	1	0	0	0	0	1	2	0	0	0	1	0	1	0	0	0	0	0	0	0
103521	99	035C05-035D01	Cul-3	FBgn0261268					1	1	1	1	0	0	0	0	0	0	1	1	0	1	0	0	0	0	0	0	0	2	0	0	0	0	0	2	0	0	0	0	0	2	0	0	0	0	1	0	0
103522	101	086F06	Lk6	FBgn0017581					1	0	0	1	1	1	0	0	0	0	0	0	0	0	0	0	0	0	0	0	0	0	0	0	0	0	0	0	0	0	0	0	0	0	0	0	0	0	0	0	0
103523	102	047A01	CG12909	FBgn0033507					1	0	0	0	4	1	0	0	0	0	0	0	0	1	0	0	0	0	0	0	0	0	0	0	0	0	0	0	0	0	0	0	0	0	0	0	0	0	0	0	0
103524	110	006C01	Pat1	FBgn0029878					1	1	1	1	1	1	0	0	0	0	1	1	0	1	0	0	0	0	0	2	0	0	1	0	0	0	1	0	0	0	0	0	0	2	1	0	1	0	1	0	0
103525	111	029F02	SoxN	FBgn0029123	CG32986	FBgn0052986	CG32987	FBgn0052987	1	1	0	0	0	0	0	0	0	0	1	1	0	0	0	0	0	0	0	2	0	0	1	0	0	0	0	0	0	0	0	0	0	0	0	0	0	0	0	0	0
103526	112	029B01	CG7627	FBgn0032026	RpS13	FBgn0010265	CSN8	FBgn0261437	1	1	1	1	4	1	0	0	0	0	0	0	0	1	0	0	0	0	0	0	0	2	0	0	0	0	0	2	0	0	0	0	0	0	0	1	0	1	2	2	0
103527	113	089E06	CG3534	FBgn0038463					1	0	1	0	2	2	0	0	0	0	0	0	0	0	0	0	0	0	0	0	0	0	0	0	0	0	0	0	0	0	0	0	0	0	0	0	0	0	2	2	0
103528	114	033B06-033B07	CG6746	FBgn0032394	Rh5	FBgn0014019	CG12264	FBgn0032393	1	1	1	0	1	1	1	1	0	0	0	1	0	2	0	0	0	0	0	0	0	2	0	0	0	0	0	2	0	0	0	1	0	0	0	1	0	1	0	0	0
103529	115	003E05	Mnt	FBgn0023215					0	0	0	0	0	0	0	0	0	0	0	0	0	0	0	0	0	0	0	0	0	0	0	0	0	0	0	0	0	0	0	0	0	0	0	0	0	0	0	0	0
103530	117	068C15	CG7368	FBgn0036179	CG6091	FBgn0036180	Muc68Ca	FBgn0036181	1	1	1	0	1	1	0	0	0	0	0	0	0	2	0	1	0	0	0	1	0	0	1	0	0	0	1	0	1	0	0	0	0	2	0	0	0	0	0	0	0
103531	118	074B02	blot	FBgn0027660	sec3	FBgn0086475	CG7630	FBgn0040793	1	1	1	1	1	1	0	0	0	0	1	1	1	1	0	0	0	0	0	1	1	0	0	0	0	0	1	0	1	0	0	0	0	2	1	0	1	0	3	0	0
103532	121	011B01	CG11138	FBgn0030400					1	1	0	0	1	1	0	0	0	0	0	1	0	0	0	0	0	0	1	1	0	0	0	0	0	0	0	0	0	0	0	0	0	0	0	0	0	0	0	0	0
103533	125	085C03	hyx	FBgn0037657					1	1	1	1	0	1	0	0	0	0	0	0	0	0	0	0	1	1	0	0	0	2	0	0	0	0	2	2	0	0	0	0	0	0	0	1	0	1	0	1	0
103534	128	086E14	CG14709	FBgn0025701	sea	FBgn0037912	CG6783	FBgn0037913	1	1	1	0	0	1	0	0	0	0	1	1	0	1	0	0	0	0	0	0	0	0	1	1	0	0	0	2	1	0	0	0	0	0	0	1	0	1	0	2	1
103535	131	023C05	v(2)k05816	FBgn0042627					1	1	1	0	0	1	0	0	0	0	0	0	0	1	0	0	0	0	0	1	1	0	0	0	0	0	2	0	0	0	0	0	0	2	0	0	0	0	0	0	0
103536	134	050A03	CG4734	FBgn0033826	CG17047	FBgn0033827	CG17048	FBgn0033828	1	1	1	1	1	1	0	0	0	0	1	1	0	1	0	0	0	0	0	0	0	0	0	0	1	1	0	0	0	0	0	1	0	0	1	1	1	1	2	3	0
103537	135	087E07-087E08	Poly	FBgn0086371					1	1	1	1	1	1	0	0	0	0	0	0	0	1	0	0	0	0	0	0	0	2	0	0	0	0	0	2	0	0	0	0	0	0	0	1	0	1	0	2	0
103538	136	017C01	CG6461	FBgn0030932					0	0	0	0	0	0	0	0	0	0	0	0	0	0	0	0	0	0	0	0	0	0	0	0	0	0	0	0	0	0	0	0	0	0	0	0	0	0	0	0	0
103539	138	057B20	CG4038	FBgn0011824	CG34396	FBgn0085425	king-tubby	FBgn0015721	1	1	1	1	1	1	0	0	1	1	0	1	1	1	0	0	0	0	0	0	0	2	0	0	0	0	0	2	0	0	0	0	0	0	0	1	0	1	0	2	0
103540	150	087E08	Aps	FBgn0036111					1	1	1	1	1	1	0	0	0	0	0	0	0	0	0	0	0	0	0	0	1	0	0	0	0	0	1	0	0	0	0	0	0	1	0	0	1	0	3	0	0
103541	153	005D01	Fs(1)M3	FBgn0005390	Grip	FBgn0029830	CG6067	FBgn0029828	1	1	1	1	1	1	0	0	0	0	0	0	0	1	0	0	0	0	0	0	0	0	0	2	0	0	0	0	1	1	0	0	0	1	1	0	1	0	3	0	0
103542	154	011A01	CG1806	FBgn0030360	CG1492	FBgn0030361	fw	FBgn0001083	1	1	1	0	1	1	1	0	0	0	0	0	0	1	0	0	0	0	0	2	0	0	0	0	0	0	0	0	0	0	1	0	0	0	0	0	0	1	0	0	0
103543	157	084E13	puckered	FBgn0004210	CG7878	FBgn0037549	CG9667	FBgn0037550	1	1	1	0	1	1	1	0	0	0	1	1	0	1	0	0	0	0	0	1	1	0	0	0	0	0	1	0	0	0	0	0	0	1	0	0	1	0	1	0	0
103544	158	049D06	CG17574	FBgn0033777					1	1	1	0	1	1	0	0	0	0	0	0	0	2	0	0	0	1	0	0	0	2	0	0	0	1	2	2	0	0	0	1	0	0	0	0	0	1	2	2	0
103545	163	073C01	Lasp	FBgn0063485					1	1	1	1	0	0	0	0	0	0	1	1	0	1	0	0	0	0	0	0	0	2	0	0	1	0	1	1	0	0	0	0	0	0	0	1	0	1	2	2	0
103546	168	048F01	Cam	FBgn0000253	Vha36-2	FBgn0033706	CG13168	FBgn0033705	1	1	1	1	1	1	0	0	0	0	1	1	0	1	0	0	0	0	1	1	0	0	0	0	0	0	0	0	0	0	0	0	1	1	0	0	0	0	0	0	1
103547	171	068F01	CG17154	FBgn0036246	Sema-5c	FBgn0028679	rols	FBgn0041096	1	1	1	0	0	0	0	0	0	0	1	1	0	0	0	0	0	0	0	0	1	0	0	0	0	0	1	0	0	0	0	0	0	1	1	0	1	0	3	0	0
103548	173	050E01	CG8331	FBgn0033906					0	0	0	0	0	0	0	0	0	0	0	0	0	0	0	0	0	0	0	0	0	0	0	0	0	0	0	0	0	0	0	0	0	0	0	0	0	0	0	0	0
103549	176	035F01	crp	FBgn0001994					1	1	1	1	1	1	0	0	0	0	1	1	0	1	0	0	0	0	1	1	0	0	0	0	1	0	0	0	0	0	0	0	1	1	0	0	0	0	0	0	0
103553	188	059B02	CycB	FBgn0000405	blw	FBgn0011211	stl	FBgn0086408	1	1	1	1	1	1	0	0	0	0	1	1	0	0	0	0	0	1	0	0	0	1	1	1	0	0	0	2	0	0	0	1	0	0	0	1	0	1	2	2	0
103554	189	035A04	CG33090	FBgn0028916	CG15286	FBgn0028531	CG15287	FBgn0028918	1	1	1	0	1	1	1	1	0	0	0	1	0	1	0	0	0	0	0	0	0	2	0	0	0	0	0	2	0	0	0	0	0	2	0	0	0	0	2	0	0
103556	204	080B01	Arf79F	FBgn0010348					1	1	1	0	1	0	0	0	1	0	1	0	0	0	0	0	0	0	0	0	0	0	1	0	0	0	0	0	0	0	0	0	0	0	0	1	0	1	2	2	0
103557	211	048E09	RpS11	FBgn0033699					1	1	1	0	0	1	0	0	0	0	0	0	1	1	0	0	0	0	1	1	0	0	0	0	0	0	0	0	0	0	0	0	1	1	0	0	0	0	3	0	0
103558	219	080B02	her	FBgn0001185	grp	FBgn0011598	squ	FBgn0002652	1	1	1	1	1	1	0	0	0	0	0	1	1	1	0	0	0	0	0	1	1	0	0	0	0	0	1	0	0	0	0	0	0	1	1	0	1	0	2	0	0
103560	223	088E12	Tm1	FBgn0003721					1	1	1	1	0	0	0	0	0	0	1	1	0	0	0	0	0	0	0	0	0	2	1	0	0	0	0	0	0	0	0	0	0	0	0	0	0	0	0	0	0
103561	224	057C07	Pu	FBgn0003162	Xpd	FBgn0015844	CG4286	FBgn0034601	1	0	0	0	0	0	0	0	0	0	0	0	0	0	0	0	0	1	0	0	0	0	0	0	0	0	0	0	0	0	0	0	0	0	0	0	0	0	0	0	0
103563	231	064C10	shep	FBgn0052423					1	1	0	1	1	1	0	0	0	0	0	0	0	0	0	0	0	0	0	0	0	0	0	0	1	1	0	2	0	0	0	1	0	0	0	0	0	0	0	0	0
103564	233	100C01	CycG	FBgn0039858					1	1	1	0	1	1	0	0	0	0	0	0	0	0	0	0	0	0	0	0	0	0	1	1	0	0	0	0	0	0	0	0	0	0	0	0	0	0	0	0	0
103566	239	047F07	Tapdelta	FBgn0021795	CG13203	FBgn0033628	CG13204	FBgn0033627	1	1	1	1	1	1	0	0	0	0	0	0	0	1	0	0	0	0	0	1	1	0	0	0	0	0	1	0	0	0	0	0	0	1	1	0	1	0	1	0	0
103567	243	012C05	inaE	FBgn0261244					1	1	0	0	2	2	0	0	0	0	0	0	1	1	0	0	0	0	0	0	0	2	0	0	0	0	0	0	0	0	0	0	0	0	0	0	0	0	0	0	0
103568	244	043E11	CG1399	FBgn0033212					0	1	0	0	0	0	0	0	0	0	0	0	0	0	0	0	0	0	0	0	0	2	0	0	0	0	0	0	0	0	0	0	0	0	0	0	0	0	0	0	0
103570	255	008E10	CG32699	FBgn0052699					1	1	1	1	1	1	0	0	0	0	0	0	0	0	0	0	0	0	0	1	2	0	0	0	0	0	2	0	0	0	0	0	0	1	0	0	1	0	0	0	1
103571	257	066B04	Ect4	FBgn0262579	CG42590	FBgn0260967	bip1	FBgn0026263	1	1	1	0	0	0	0	0	0	0	1	1	0	0	0	0	0	0	0	0	0	2	0	0	1	0	0	2	0	0	0	0	0	0	0	1	1	1	2	2	0
103572	266	003A06	CG13760	FBgn0040375	wds	FBgn0040066	CG13759	FBgn0040376	1	1	1	1	0	1	0	0	0	0	1	1	0	1	0	0	0	0	0	2	0	0	1	0	0	0	0	0	0	0	0	0	0	2	0	0	1	0	2	0	0
103573	269	036A10	grp	FBgn0011598					1	1	1	0	4	4	1	1	0	0	1	1	0	0	0	1	0	1	0	0	1	2	0	0	0	0	1	2	0	0	0	1	0	0	0	0	0	1	2	2	0
103574	270	082C02	CG34357	FBgn0085386					1	1	1	1	1	0	1	0	0	0	0	0	2	0	0	0	0	0	0	1	0	0	1	0	0	0	0	0	0	0	0	0	0	0	0	1	0	0	0	2	0
103575	280	093F02	DNApol-_180	FBgn0259113					1	1	1	0	4	4	1	1	1	0	0	0	0	1	0	0	0	0	0	2	0	0	0	0	1	0	0	0	0	0	0	0	0	2	0	0	1	0	2	0	0
103577	282	082A05	CG1090	FBgn0037238					1	1	1	1	0	0	0	0	0	0	1	1	0	0	0	0	0	0	0	0	0	2	1	0	0	0	0	2	0	0	0	0	0	0	0	1	1	1	2	2	0
103578	283	089A06	Hmt-1	FBgn0038376					1	1	1	1	1	1	0	0	0	0	1	1	0	1	0	0	0	0	0	0	0	2	0	0	0	0	0	2	0	0	0	0	0	2	0	0	1	0	2	0	0
103579	293	054E01	CG6424	FBgn0028494	CG10933	FBgn0034264	CG10934	FBgn0034263	1	1	1	0	0	0	0	0	0	0	1	1	0	1	0	0	0	0	0	0	0	0	0	0	0	0	0	0	0	0	0	1	0	0	0	1	0	1	0	2	0
103580	295	011F01	Rbp1-like	FBgn0030479					1	1	1	1	1	1	0	0	0	0	0	0	1	1	0	0	0	0	0	2	1	0	0	0	0	0	1	0	0	0	0	0	0	2	1	0	1	0	2	0	0
103581	297	074B04-074C02	frc	FBgn0042641					1	1	1	1	1	1	0	0	0	0	1	1	2	1	0	0	1	0	0	2	1	0	0	0	0	0	0	0	0	0	0	0	0	0	0	0	0	1	0	2	0
103582	298	001E04	CG14624	FBgn0040357	CG11382	FBgn0040367			1	1	0	0	0	4	0	0	0	0	0	0	0	0	0	0	0	0	0	0	0	0	1	0	0	0	0	2	0	0	0	0	0	0	0	0	0	0	0	0	0
103583	302	100E03	mod	FBgn0002780					1	1	1	1	1	1	0	0	0	0	1	1	0	0	0	1	0	1	0	0	0	2	0	0	0	0	0	2	0	0	0	0	0	0	0	0	1	1	2	2	0
103584	310	066C08	Idh	FBgn0001248					1	1	1	1	0	0	0	0	0	0	1	1	0	0	0	0	0	0	0	0	0	2	0	0	0	0	0	2	0	0	0	0	0	0	0	1	0	1	1	2	0
103585	319	039A01	CG42238	FBgn0250867	_Int-nu	FBgn0010395	CG9265	FBgn0032910	1	1	1	0	1	1	1	1	0	0	0	0	0	1	0	0	0	0	0	2	0	0	0	0	0	0	1	0	0	0	0	0	0	2	0	0	0	0	1	0	0
103586	324	052E05	Rho1	FBgn0014020					0	0	0	0	0	0	0	0	0	0	0	0	0	0	0	0	0	0	0	0	0	0	0	0	0	0	0	0	0	0	0	0	0	0	0	0	0	0	0	0	0
103589	331	099A05	stg	FBgn0003525	SP1029	FBgn0040282			1	1	1	0	0	0	0	0	0	0	1	1	0	0	0	0	0	0	0	1	1	0	0	0	0	0	1	0	0	0	0	0	1	1	0	0	0	0	0	0	0
103590	334	008C04	CG42388	FBgn0259734					0	1	1	0	0	0	0	0	0	0	0	0	0	0	0	0	0	0	0	0	0	2	0	0	0	0	0	2	0	1	0	0	0	0	0	0	0	0	0	2	0
103591	345	065F05	CG8596	FBgn0035767	CG14834	Fbgn0035768	Srp19	FBgn0015298	1	1	1	0	0	1	0	0	0	0	0	1	0	1	0	0	0	0	0	0	0	2	0	0	0	0	0	2	0	0	0	0	0	0	0	1	1	1	2	2	0
103592	346	053A04	Khc	FBgn0001308	CG33017	FBgn0053017			1	1	1	0	4	1	1	1	0	0	1	1	0	1	0	0	0	0	0	0	0	2	1	0	0	0	1	2	0	0	0	0	0	0	0	0	0	1	0	0	0
103593	347	057F10	LBR	FBgn0034657	Tango11	FBgn0050404	CG30398	FBgn0050398	1	1	1	0	0	1	1	0	0	0	0	0	2	1	0	0	0	0	0	0	1	2	0	0	0	0	1	2	0	0	0	0	0	1	0	0	1	0	3	0	0
103594	351	043A02	Gadd45	FBgn033153					1	1	1	1	1	1	0	0	0	0	0	0	0	0	0	0	0	0	0	0	1	2	0	0	0	0	1	2	0	0	0	0	0	2	0	0	1	0	3	0	0
103595	355	065A06	l(3)mbn	FBgn0002440					0	1	0	0	0	0	0	0	0	0	0	0	0	0	0	0	0	0	0	0	1	2	0	0	0	0	1	2	0	0	0	0	0	0	0	0	0	0	0	0	0
103597	359	009D04	CG1628	FBgn0030218					1	1	1	1	0	1	0	0	0	0	0	1	0	0	0	0	0	0	0	1	0	0	1	0	0	0	0	0	0	0	0	0	0	0	0	0	1	0	2	0	0
103599	364	056F11	Ate1	FBgn0025720					0	0	1	0	0	0	0	0	0	0	0	0	0	0	0	0	0	0	0	0	0	0	0	0	0	0	0	0	0	0	0	0	0	1	0	0	0	0	0	0	0
103600	369	028E03	Bsg	FBgn0261822	Mcr	FBgn0020240			1	1	1	0	1	1	0	0	0	0	0	0	0	1	0	1	0	1	0	1	0	0	1	0	0	0	0	0	0	0	0	0	0	1	1	0	1	0	3	0	0
103601	370	011B16	ade5	FBgn0020513	CG12717	FBgn0030420	CG3812	FBgn0030421	1	1	0	0	0	0	0	0	0	0	0	0	1	0	0	0	0	0	0	0	0	2	0	0	0	0	1	2	1	1	0	0	0	0	0	0	0	0	0	0	0
103602	380	045A02	CG8080	FBgn0033373					0	1	1	1	0	0	0	0	0	0	0	0	0	0	0	0	0	0	0	0	0	2	0	0	0	0	0	2	0	0	0	1	0	0	0	1	0	1	0	2	0
103603	389	099B10	yata	FBgn0260990	ATPsyn-gamma	FBgn0020235	kay	FBgn0001297	0	1	0	0	0	0	0	0	0	0	0	0	0	0	0	0	0	0	0	0	0	0	0	0	0	0	0	2	0	0	0	0	0	0	0	0	0	0	0	0	0
103604	394	076D04	Mi-2	FBgn0262519					0	1	1	0	0	0	0	0	0	0	0	0	0	0	0	0	0	0	0	0	0	0	0	2	0	0	0	2	0	0	0	0	0	0	0	1	0	0	0	0	0
103605	395	088F03	CG5073	FBgn0038331	CG43073	FBgn0262483	CG6136	FBgn0038332	1	0	1	0	4	1	0	0	0	0	0	0	0	0	0	0	0	0	0	0	0	0	0	0	0	0	0	0	0	0	0	0	0	1	1	0	1	0	1	0	0
103606	396	054B07	CG6568	FBgn0034210					1	1	1	1	1	0	0	0	0	0	0	0	0	0	0	0	0	0	0	0	0	2	0	0	0	0	0	2	0	0	0	1	0	2	1	0	1	0	1	0	0
103608	404	015D06	CG43077	FBgn0262487	CG8949	FBgn0030812			1	1	0	0	1	1	0	0	0	0	0	0	0	0	0	0	0	0	0	0	0	0	0	0	0	0	1	1	0	0	0	0	0	0	0	0	0	0	0	0	0
103610	408	013D03	CG7860	FBgn0030653					1	1	1	1	1	1	1	1	0	0	0	0	0	0	0	1	0	1	0	0	0	2	0	0	0	0	0	2	0	0	0	0	0	0	0	1	0	1	0	2	0
103611	409	035F01	crp	FBgn0001994		FBgn0040079			1	1	1	1	1	1	0	0	0	0	1	1	0	1	0	0	0	0	0	1	0	0	0	0	1	0	1	0	0	0	0	0	0	2	0	0	0	0	2	0	0
103613	421	NFSA	CG41099	FBgn0039955	CG41520	FBgn0087011			1	1	1	0	0	4	0	0	0	0	1	1	0	2	0	1	0	0	0	0	1	2	0	0	0	0	1	2	0	0	0	0	0	0	0	1	0	1	3	2	1
103614	423	NFSA	CG40169	FBgn0259995	CG40181	FBgn0058181	CG17684	FBgn0058181	1	1	1	1	0	1	0	0	0	0	1	1	0	2	0	1	0	0	0	0	0	2	1	0	0	0	0	2	0	0	0	0	0	0	0	1	0	1	0	2	0
103615	424	002C05	Actn	FBgn0000667					1	1	1	0	0	4	0	0	0	0	0	0	0	0	0	0	0	0	0	0	0	0	0	0	0	0	0	0	0	0	0	1	0	0	0	0	0	1	0	2	0
103616	425	021B07	CG3625	FBgn0031245					1	1	1	0	4	0	1	1	0	0	0	1	0	1	0	0	0	0	0	0	0	2	0	0	0	0	2	0	0	0	0	0	0	0	0	0	0	0	2	0	0
103617	426	089B14	tara	FBgn0040071					0	0	0	0	0	0	0	0	0	0	0	0	0	0	0	0	0	0	0	0	0	0	0	0	0	0	0	0	0	0	0	0	0	0	0	0	0	0	0	0	0
103618	430	088D02	eff	FBgn0011217					0	0	0	0	0	0	0	0	0	0	0	0	0	0	0	0	0	0	0	0	0	0	0	0	0	0	0	0	0	0	0	0	0	0	0	0	0	0	0	0	0
103619	431	045F01	brp	FBgn0259246	CG1888	FBgn0033421			1	1	1	1	1	0	0	0	0	0	0	0	0	0	0	0	0	0	0	1	0	0	1	0	0	0	2	0	0	0	0	0	0	2	0	0	0	0	0	0	0
103620	432	048F08	CG8841	FBgn0033713					1	1	1	1	1	1	1	1	0	0	1	1	0	0	0	0	0	0	0	0	1	2	0	0	0	0	1	2	0	0	0	1	0	0	0	1	0	1	2	2	0
103621	434	024F02	Elp3	FBgn0031604					1	0	1	0	1	1	0	0	0	0	1	1	0	0	0	0	0	0	0	0	0	0	0	0	0	0	0	0	0	0	0	0	0	0	0	0	0	1	0	2	0
103622	439	083A06	CG31547	FBgn0051547					1	1	0	1	0	0	0	0	0	0	1	1	0	0	0	0	0	0	0	0	0	0	0	0	0	1	0	0	0	0	0	0	0	0	0	0	0	0	0	0	0
103623	501	045A02	CG13741	FBgn0033374	Uhg4	FBgn0083124	CG8078	FBgn0033375	1	1	1	1	0	1	0	0	0	0	1	1	0	1	0	0	0	0	0	0	0	2	0	0	0	0	0	2	0	0	0	0	0	2	1	0	1	0	2	0	0
103625	509	046A01	Mmp2	FBgn0033438					1	1	1	0	0	0	0	0	0	0	1	1	0	0	0	0	0	0	0	0	0	2	1	0	0	0	0	0	0	0	0	0	0	0	0	0	0	1	0	2	0
103626	511	029C03	Akap200	FBgn0027932					1	1	1	0	0	0	0	0	0	0	1	1	0	0	0	0	0	0	0	0	0	0	1	0	0	1	0	0	0	0	0	0	0	0	0	0	0	0	0	0	0
103627	512	043E16	CanB2	FBgn0015614					1	1	1	1	1	0	0	0	0	0	1	1	0	0	0	0	0	0	0	0	0	0	1	1	0	0	0	2	0	0	0	0	0	0	0	0	0	1	0	0	0
103628	513	033B11	l(2)01810	FBgn0010497	CG6734	FBgn0032395	CG18788	FBgn0042126	1	1	1	1	1	1	0	0	0	0	0	0	0	0	0	0	0	0	0	1	1	0	0	0	0	0	1	0	0	0	0	0	1	1	0	0	0	0	0	0	0
103629	514	040A05	tsh	FBgn0003866					1	1	0	0	0	1	0	0	0	0	0	0	0	2	0	1	0	0	0	1	2	0	0	0	0	0	2	0	0	0	0	0	0	0	0	0	0	0	0	0	0
103630	515	018C02	out	FBgn0259834	gfA	FBgn0086778			1	1	1	1	1	1	0	0	0	0	1	1	0	0	0	0	0	0	0	0	0	0	0	0	1	1	1	2	0	0	0	0	0	0	0	0	0	1	0	2	0
103631	516	024C08	CG31957	FBgn0051957					1	1	1	0	0	0	0	0	0	0	1	1	0	0	0	0	0	0	0	0	0	1	0	2	0	0	0	2	0	0	0	1	0	0	0	0	0	1	0	2	0
103632	517	028C04 - 028C07	LanB1	FBgn0261800	cdc14	FBgn0031952	r2d2	FBgn0031951	0	0	1	1	0	0	0	0	0	0	0	0	0	0	0	0	0	0	0	0	0	0	0	0	0	0	0	0	0	0	0	0	0	1	1	0	1	0	2	0	0
103633	519	009F02	Imp	FBgn0030235					1	1	1	0	1	1	0	0	0	0	0	0	1	1	0	0	0	0	0	0	1	2	0	0	0	0	2	1	1	0	0	0	0	1	1	0	1	0	2	0	0
103634	520	075C06	rpr	FBgn0011706					1	1	1	0	4	0	0	0	0	0	0	0	1	1	0	0	0	0	0	1	1	0	0	0	0	0	1	0	1	0	0	0	1	1	0	0	0	0	0	0	0
103635	521	016E01	CG15814	FBgn0030873	CG6506	FBgn0030874	CG32554	FBgn0052554	1	1	1	1	0	1	0	0	0	0	1	1	0	1	0	0	0	0	0	2	1	0	0	0	0	0	1	0	0	0	0	0	0	2	0	0	1	0	2	0	0
103636	522	012C01	rdgB	FBgn0003218	Yp3	FBgn0004047			1	0	1	0	1	1	0	0	0	0	0	1	0	0	0	0	0	0	0	0	0	0	0	0	0	0	0	0	0	0	0	0	0	2	0	0	1	0	2	0	0
103637	524	057E06	MESK2	FBgn0043070					1	1	1	1	1	1	0	0	0	0	1	1	0	0	0	0	0	0	0	1	1	0	0	0	1	0	1	0	0	0	0	0	0	2	0	0	0	0	1	0	0
103638	526	023A03	CG9894	FBgn0031453					1	1	1	0	1	1	0	1	0	0	1	1	0	1	0	0	0	0	0	0	0	1	0	0	0	0	0	2	0	0	0	0	0	0	0	1	0	1	2	2	0
103639	527	098B06	Mes-4	FBgn0039559					1	1	1	0	1	1	0	0	0	0	1	1	1	1	0	0	0	0	1	1	0	0	0	0	0	0	0	0	0	0	0	0	0	0	0	1	0	1	0	2	0
103640	528	095D09-095D10	Rox8	FBgn0005649					1	1	0	0	0	4	0	0	0	0	1	1	0	2	0	0	0	0	0	0	0	2	0	0	0	0	0	2	0	0	0	0	0	0	0	0	0	0	0	0	0
103641	535	023F06	Thor	FBgn0022073	CG15414	FBgn0031542	pgant4	FBgn0051956	1	1	0	0	1	1	0	0	0	0	0	0	0	1	0	0	0	0	0	2	0	0	0	0	0	0	0	2	0	0	0	0	0	0	0	0	0	0	0	0	0
103642	536	060A12	Tal	FBgn0023477					1	1	1	1	1	1	0	0	0	0	1	1	0	1	0	0	0	0	0	1	1	0	0	0	0	0	2	0	0	0	0	0	0	2	1	0	1	0	2	0	0
103643	539	079B02	TyrR	FBgn0004514					1	1	1	1	1	1	1	0	0	0	0	0	0	0	0	0	0	0	0	2	1	0	0	0	0	0	1	0	0	0	0	0	0	2	0	0	1	0	2	0	0
103644	541	018C03	kek5	FBgn0031016					1	1	1	0	1	1	0	0	0	0	0	0	0	1	0	0	0	0	0	2	0	0	0	0	1	0	0	0	1	0	0	0	0	0	0	1	0	1	3	2	0
103645	542	038F05	sky	FBgn0032901					1	1	0	1	0	0	0	0	0	0	1	1	0	2	0	0	0	0	0	0	0	0	0	0	1	1	2	2	0	0	0	0	0	0	0	0	0	0	0	0	0
103646	546	095D01	Gdh	FBgn0001098					1	1	1	1	4	1	0	0	0	0	0	0	2	1	0	0	0	0	1	1	0	0	0	0	1	0	0	0	0	0	0	0	1	1	0	0	0	0	0	0	0
103647	549	075B01	Eip75B	FBgn0000568					1	1	1	1	1	1	0	1	0	0	0	1	0	1	0	0	0	0	0	0	0	2	1	1	1	0	2	2	0	0	0	0	0	2	0	0	0	0	2	0	0
103648	553	044E01	Acsl	FBgn0263120					1	1	1	0	1	1	0	0	0	0	1	1	0	0	0	0	0	0	0	0	0	2	0	0	0	0	0	2	0	0	0	1	0	0	0	1	0	0	0	0	0
103649	554	085C03	Kdm2	FBgn0037659					1	1	1	0	0	0	0	0	0	0	1	1	0	0	0	0	0	0	0	0	0	0	0	0	0	0	0	2	0	0	0	0	0	0	0	1	0	1	0	2	0
103650	555	038C05-038C06	CG16798	FBgn0032856	CG10947	FBgn0032857	Ugt37a1	FBgn0026756	1	1	1	1	0	0	0	0	1	1	0	0	0	2	0	0	0	0	0	0	0	2	0	0	0	0	2	2	0	0	0	0	0	2	1	0	1	0	1	0	0
103651	556	061B30	mRpL17	FBgn0035122					1	1	1	1	1	1	0	1	0	0	0	0	0	1	0	0	0	0	0	2	1	0	0	0	0	0	1	0	0	0	0	0	0	1	1	0	0	0	2	0	1
103652	559	061F60-061F70	l(3)02640	FBgn0010786					0	0	0	0	0	0	0	0	0	0	0	0	0	0	0	0	0	0	0	0	0	0	0	0	0	0	0	0	0	0	0	0	0	0	0	0	0	0	0	0	0
103653	563	057A06	bl	FBgn0015907	l(2)05510	FBgn0028622			1	1	1	0	1	1	0	0	0	1	0	0	2	1	1	1	1	1	0	0	1	2	0	0	0	0	1	2	0	0	0	0	0	2	1	0	1	0	2	0	1
103654	565	003C03	CG32793	FBgn0052793	CG14424	FBgn0025644	CG3592	FBgn0029642	0	0	0	0	0	0	0	0	0	0	0	0	0	0	0	0	0	0	0	0	0	0	0	0	0	0	0	0	0	0	0	0	0	0	0	0	0	0	0	0	0
103655	568	002B13	Pgam5	FBgn0023517					1	1	1	1	1	1	0	0	0	0	1	1	0	0	0	0	0	0	0	1	1	0	0	0	0	0	1	0	0	0	0	0	0	1	1	0	1	0	1	0	1
103656	569	022D10	aop	FBgn0000097					1	1	1	1	0	1	0	0	0	0	1	1	2	1	0	0	0	0	0	1	0	0	1	0	0	0	0	0	0	0	0	0	0	2	1	0	1	0	1	0	0
103657	572	002A01-002A02	CG11448	FBgn0024985	futsch	FBgn0259108	CG32813	FBgn0052813	1	1	1	0	1	0	0	0	0	0	0	1	0	0	0	0	0	0	0	0	0	2	1	0	0	0	1	2	0	0	0	0	0	0	0	1	0	1	1	2	0
103658	576	086E10	fabp	FBgn0037913	sea	FBgn0037912	CG14709	FBgn0025701	1	1	1	1	1	1	0	0	0	0	1	1	0	0	0	0	0	0	0	2	1	0	0	0	1	0	1	0	0	0	0	0	0	2	1	0	1	0	2	0	0
103659	583	030A02	CG32982	FBgn0052982					1	1	1	0	0	0	1	1	0	0	0	0	0	0	0	0	0	0	0	0	0	0	0	1	0	0	0	0	0	0	0	1	0	0	0	0	0	0	0	2	0
103660	584	060B09	CG13564	FBgn0034973					1	1	1	1	0	4	0	0	0	0	0	1	0	2	0	0	0	1	0	0	0	2	0	0	0	0	1	2	0	0	0	1	0	0	0	1	0	1	0	2	0
103661	586	010E01	m	FBgn0002577	CG9360	FBgn0030332			1	1	1	0	0	0	0	0	0	0	0	1	0	2	0	0	0	0	0	0	0	0	0	0	0	0	0	2	0	0	0	1	0	0	0	1	1	1	0	2	0
103662	587	087C07	Men	FBgn0002719					1	1	1	1	1	1	0	0	0	0	1	1	0	0	0	0	0	0	0	0	2	2	0	0	0	0	1	2	0	0	0	1	0	0	0	1	0	1	0	2	0
103663	588	076A05	fal	FBgn0028380					1	1	1	1	1	1	0	0	0	0	1	1	0	1	0	0	0	0	0	0	0	2	0	0	0	0	1	2	0	0	0	1	0	0	0	1	0	1	0	2	0
103664	590	029B01-029B02	RPS13	FBgn0010265	CSN8	FBgn0028835	CG7627	FBgn0036686	1	1	1	0	0	0	0	0	0	0	0	0	2	1	0	0	0	0	1	1	0	0	0	0	0	0	0	0	0	0	0	0	0	1	1	0	1	0	3	0	0
103666	594	011E09	CG15745	FBgn0030469	CG1622	FBgn0030468	CG1764	FBgn0030467	1	1	1	1	0	0	0	0	0	0	1	1	0	0	0	0	0	0	0	2	0	0	0	0	0	0	0	0	0	0	1	0	0	2	0	0	0	0	1	0	0
103667	597	098B06	RpL4	FBgn0003279	CG5508	FBgn0027579			1	1	1	0	0	0	0	0	0	0	0	1	0	0	0	0	0	0	0	0	0	0	0	0	0	1	0	0	0	0	0	0	0	0	0	0	0	1	0	2	0
103668	598	084F13	DppIII	FBgn0037580					1	1	1	0	1	1	0	0	0	0	0	0	0	2	0	0	0	0	0	0	0	0	0	0	0	1	0	0	0	0	0	0	0	0	0	0	0	0	0	2	0
103669	599	017D01	CG6659	FBgn0030946					1	1	1	1	4	1	1	1	0	0	1	1	0	1	0	0	0	0	0	2	0	0	0	0	1	0	1	0	0	0	0	0	0	2	1	0	1	0	2	0	0
103670	600	008F01	CG42797	FBgn0261931	Aats-lys	FBgn0027084			0	1	1	0	0	0	0	0	0	0	0	0	0	0	0	0	0	0	0	0	0	2	0	0	0	0	0	1	0	0	0	0	0	0	0	0	0	1	1	2	0
103671	605	073E04	CG6664	FBgn0036685	CG7728	FBgn0036686	CG3764	FBgn0036684	0	0	0	0	0	0	0	0	0	0	0	0	0	0	0	0	0	0	0	0	0	0	0	0	0	0	0	0	0	0	0	0	0	0	0	0	0	0	0	0	0
103673	608	038A07	sick	FBgn0260966					1	1	0	1	0	4	0	0	0	1	1	1	0	0	0	0	0	0	0	0	0	0	0	0	0	0	0	0	0	0	1	1	0	0	0	0	0	0	0	0	0
103674	609	029C03	Akap200	FBgn0027932					1	1	0	0	1	1	1	1	0	0	1	1	0	1	0	0	0	0	0	0	0	0	2	2	0	0	0	2	0	0	0	1	0	0	0	0	0	0	0	0	0
103675	610	015A08	CG4768	FBgn0030790					1	1	1	1	1	1	0	0	0	0	1	1	1	1	0	0	0	0	0	1	2	0	0	0	0	0	2	0	0	0	0	0	0	1	1	0	1	0	1	0	0
103677	615	075D06	Capr	FBgn0042134	GNBP2	FBgn0040322	GNBP1	FBgn0040323	1	1	1	0	1	1	0	0	0	0	1	1	2	1	0	0	0	0	1	1	0	0	0	0	0	0	0	0	0	0	0	0	1	1	0	0	0	0	0	0	0
103678	618	043F02	Kdm4A	FBgn0033233					1	1	0	1	0	0	0	0	0	0	1	1	0	1	0	0	0	0	0	2	1	0	0	0	0	0	1	0	0	0	0	1	0	0	0	0	0	0	0	0	0
103679	620	026A03	dsf	FBgn0015381	Gpdh	FBgn0001128	Sfp26Ad	FBgn0261055	1	1	1	1	4	1	1	0	1	0	1	1	0	1	0	0	0	0	0	0	0	2	1	0	0	0	1	2	0	0	0	1	0	2	0	0	0	0	0	0	0
103680	621	047E01	metro	FBgn0050021					1	1	1	0	0	0	1	1	0	0	0	0	0	2	0	1	0	0	0	0	0	0	1	0	0	0	1	2	0	0	0	1	0	0	0	0	0	1	0	2	0
103681	624	052D11	ATPCL	FBgn0020236					1	1	1	1	1	1	0	0	0	0	0	1	2	1	1	0	0	0	0	0	0	0	0	0	0	1	0	2	0	0	0	0	0	0	0	1	0	1	1	2	0
103682	625	001E04	CG11382	FBgn0040367	CG14624	FBgn0040357	CG11398	FBgn0040366	1	1	1	1	1	1	0	0	0	0	1	1	1	1	0	0	0	0	0	1	2	0	0	0	0	0	2	0	1	0	0	0	0	0	0	0	0	1	0	2	0
103683	626	003B01	sgg	FBgn0003371					1	1	0	0	1	1	0	0	0	0	0	1	2	1	0	0	0	0	0	0	0	0	1	1	0	0	0	0	0	0	0	0	0	0	0	0	0	0	0	0	0
103684	628	045B03	ltd	FBgn0002567					1	1	1	1	1	1	1	1	1	0	0	1	0	2	0	0	0	0	0	0	0	2	0	0	0	0	0	2	0	0	0	1	0	2	0	0	1	0	1	0	0
103685	632	096C02	Bili	FBgn0039282	danr	FBgn0039283	Clbn	FBgn0259152	1	1	0	0	4	1	0	0	0	1	0	0	0	2	0	0	0	0	0	0	1	1	0	0	0	0	2	2	1	1	0	1	0	0	0	0	0	0	0	0	0
103687	636	012B09-012B10	Pdcd4	FBgn0030520					1	1	1	0	1	1	0	0	0	0	1	1	1	1	0	0	0	0	0	1	2	0	0	0	0	0	2	0	1	0	0	0	0	1	0	0	1	0	0	0	0
103688	640	053C09	Cdk4	FBgn0016131					0	0	0	0	0	0	0	0	0	0	0	0	0	0	0	0	0	0	0	0	0	0	0	0	0	0	0	0	0	0	0	0	0	0	0	0	0	0	0	0	0
103689	642	005B06	IntS6	FBgn0261383					1	1	1	0	3	4	0	0	0	0	0	1	0	2	0	0	0	0	0	0	0	2	0	0	0	0	0	2	0	0	0	0	0	0	0	1	0	1	1	2	0
103690	643	006F05	Sxl	FBgn0003659					1	1	1	1	4	1	0	0	0	0	0	1	0	1	0	0	0	0	0	0	0	2	0	0	0	0	0	2	0	1	0	1	0	0	0	1	0	1	0	2	0
103691	645	036C07	Lrch	FBgn0032633					1	1	1	1	0	4	0	1	0	1	0	0	0	2	0	0	0	0	0	0	0	2	1	2	0	0	1	2	0	1	0	0	0	0	0	0	0	1	0	2	0
103692	646	054F01	olf-F	FBgn0041585					1	1	1	1	4	1	1	0	0	0	0	0	0	2	0	0	0	1	0	0	0	2	0	0	0	0	0	2	0	0	0	0	0	0	0	0	0	1	0	2	0
103693	647	046E01	cdc2rk	FBgn0013435	mRpL42	FBgn0033480	CG2292	FBgn0033479	1	0	0	0	4	1	0	0	0	0	0	1	0	2	0	0	0	0	0	0	0	0	0	0	0	0	0	0	0	0	0	0	0	0	0	0	0	0	0	0	0
103694	649	044A04	CG12769	FBgn0033252					1	0	0	0	1	1	0	0	0	0	0	0	0	0	0	0	0	0	0	0	0	0	0	0	0	0	0	0	0	0	0	0	0	0	0	0	0	0	0	0	0
103695	650	035B01	spel1	FBgn0015546	Pgant35A	FBgn0001970	Rab14	FBgn0015791	1	1	1	0	1	1	0	0	0	0	0	1	0	0	0	0	0	0	0	1	2	0	0	0	0	0	2	0	0	0	0	0	0	1	1	0	1	0	1	0	0
103696	651	067B06	CG32043	FBgn0052043					1	0	1	1	1	1	0	0	0	0	0	0	0	1	0	0	0	0	0	0	0	0	0	0	0	0	0	0	0	0	0	0	0	0	0	0	0	0	0	0	0
103697	652	042B02	jing	FBgn0086655					1	1	1	1	4	1	0	0	1	0	1	1	0	1	0	0	0	0	0	2	0	0	0	0	0	0	1	0	0	0	0	0	0	2	0	0	1	0	1	0	0
103698	658	066B03	bip1	FBgn0026263					1	1	1	0	1	1	0	0	0	0	0	1	0	1	0	0	0	0	0	2	1	0	0	0	0	0	1	0	0	0	0	0	0	0	0	1	0	1	0	2	0
103699	659	003A04	trol	FBgn0261451	Pdfr	FBgn0260753			1	1	1	1	0	0	0	0	0	0	1	1	0	2	0	1	0	1	0	2	1	0	0	0	1	0	2	0	0	0	0	0	0	1	0	0	0	0	0	0	0
103700	661	001A01	cin	FBgn0000316	CG13377	FBgn0261446	ewg	FBgn0005427	1	1	0	1	0	0	0	0	0	0	0	0	0	1	0	0	0	0	0	1	1	0	0	0	0	0	2	0	0	0	0	0	0	0	0	0	0	0	0	0	0
103701	662	028D01	mts	FBgn0004177					1	1	0	0	0	1	0	0	0	0	0	0	0	0	0	0	0	0	0	0	0	0	1	0	0	0	0	0	0	0	0	0	0	0	0	0	0	0	0	0	0
103703	672	073D01	CG9674	FBgn0036663	nudC	FBgn0021768	CG13024	FBgn0036665	1	1	1	1	1	4	0	0	0	0	1	1	0	2	0	1	0	1	0	0	0	2	0	0	0	0	0	2	0	0	0	1	0	0	0	0	0	1	1	2	0
103704	675	047A11-047A13	lola	FBgn0005630					1	1	1	1	1	4	0	1	0	0	1	1	1	2	0	0	0	1	0	2	0	0	1	0	0	0	1	0	0	0	0	0	0	1	0	0	0	0	3	0	0
103705	677	092A02	Dl	FBgn0000463					1	1	1	0	1	1	0	0	0	0	0	0	0	0	0	0	0	0	0	1	1	0	0	0	0	0	1	0	0	0	0	0	0	1	1	0	1	0	3	0	1
103706	679	075C02	CG7313	FBgn0036783	CG7320	FBgn0036782			1	1	1	0	0	0	0	0	0	0	0	1	0	2	0	0	0	0	0	0	0	1	0	0	0	0	0	0	0	0	0	0	0	0	0	0	0	1	1	1	0
103707	680	021B05	kis	FBgn0086902					1	1	1	0	1	4	0	1	0	1	1	1	0	2	0	0	0	1	0	0	0	2	0	0	0	0	0	2	0	0	0	0	0	2	0	0	1	0	1	0	0
103708	683	010B03	CG11756	FBgn0030290					1	1	1	0	4	4	1	1	0	0	0	0	0	1	0	0	0	0	0	0	0	1	0	0	0	0	0	0	0	0	0	1	0	0	0	1	0	1	1	2	0
103709	686	087B14	Hsp70Bc	FBgn0013279	Hsp70Bbb	FBgn0051354	Hsp70Bb	FBgn0013278	1	1	0	0	2	2	0	0	0	0	1	1	0	0	0	0	0	0	0	0	0	0	0	2	0	0	0	2	0	0	0	1	0	0	0	0	0	0	0	0	0
103710	687	062E07	RpL8	FBgn0024939	msn	FBgn0010909	dos	FBgn0016794	0	0	0	0	0	0	0	0	0	0	0	0	0	0	0	0	0	0	0	0	0	0	0	0	0	0	0	0	0	0	0	0	0	0	0	0	0	0	0	0	0
103711	688	089B14	tara	FBgn0040071					0	0	0	0	0	0	0	0	0	0	0	0	0	0	0	0	0	0	0	0	0	0	0	0	0	0	0	0	0	0	0	0	0	0	0	0	0	0	0	0	0
103712	690	061C09	emc	FBgn0000575					0	0	1	1	0	0	0	0	0	0	0	0	0	0	0	0	0	0	0	0	0	0	0	0	0	0	0	0	0	0	0	0	1	1	0	0	0	0	0	0	0
103715	699	047D06	shn	FBgn0003396					1	1	1	1	0	0	0	0	0	0	1	1	0	1	0	0	0	0	0	2	1	0	0	0	1	1	2	0	0	0	0	0	0	1	1	0	1	0	3	0	1
103716	700	017C01	Ggt-1	FBgn0030932					1	1	1	0	0	0	0	0	0	0	0	0	0	1	0	0	0	0	0	1	1	0	0	0	0	0	1	0	0	0	0	0	1	1	0	0	0	0	0	0	0
103717	701	004F04	TrxT	FBgn0029752	dhd	FBgn0011761	CG4198	FBgn0029753	1	0	0	1	1	0	0	0	0	0	0	1	0	0	0	0	0	0	0	0	0	0	0	0	0	0	0	0	0	0	0	0	0	0	0	0	0	0	0	0	0
103718	708	045F01	Or45b	FBgn0033422	CG1888	FBgn0033421	CG1809	FBgn0033423	1	1	1	1	1	1	1	1	0	0	1	1	0	1	0	0	0	0	0	1	0	0	0	0	0	0	0	0	0	0	0	0	0	1	0	0	0	0	0	0	0
103719	709	099E03	CG9737	FBgn0039758	CG9733	FBgn0039759			1	1	1	0	1	1	0	0	0	0	1	1	1	1	0	0	0	0	0	0	0	2	0	0	0	0	0	2	0	0	0	0	0	0	0	1	0	1	0	2	0
103720	710	0170D1	CCKLR-17D1	FBgn0259231	Cyp308a1	FBgn0030949			1	1	1	0	1	0	0	1	0	0	0	0	0	2	0	1	0	0	0	0	0	2	0	0	0	0	1	2	0	0	0	0	0	2	0	0	0	0	0	0	0
103722	712	088A06	foxo	FBgn0038197					1	1	1	1	0	0	0	0	0	0	1	1	0	0	0	0	0	0	0	1	1	0	0	0	1	0	0	0	0	0	1	0	0	1	0	0	1	0	1	0	0
103724	717	007D05	fs(1)h	FBgn0004656					1	1	1	1	1	1	0	0	0	1	0	0	0	1	0	0	0	0	0	2	0	0	0	0	0	0	1	0	0	0	0	0	0	2	1	0	1	0	1	0	0
103726	723	052B02	CG42524	FBgn0260429	CG18324	FBgn0033905			1	1	1	1	1	2	0	0	0	0	1	1	0	2	0	0	0	0	0	0	0	2	0	0	0	0	1	2	0	0	0	0	0	0	0	0	0	0	0	0	0
103728	725	026C02	Ddr	FBgn0053531					1	0	0	0	0	0	0	0	0	0	1	1	0	0	0	0	0	0	0	0	0	0	0	0	0	0	0	0	0	0	0	0	0	0	0	0	0	0	0	0	0
103730	729	044C04	pdm3	FBgn0261588					1	1	1	0	2	2	0	1	1	1	1	1	0	0	0	0	0	0	0	0	0	0	0	2	0	0	2	2	0	0	0	1	0	0	1	1	1	1	0	2	0
103731	731	048A03	tou	FBgn0033636					1	1	1	0	1	0	0	0	0	0	0	0	0	0	0	0	0	0	0	0	0	0	0	2	0	0	2	2	0	0	0	0	0	0	0	0	0	0	3	3	1
103732	703	016C01	CG8188	FBgn0030863	CG32556	FBgn0052556	par-6	FBgn0026192	1	1	1	0	1	1	0	0	0	0	1	1	0	0	0	0	0	0	0	1	1	0	0	0	0	0	1	0	0	0	0	0	0	1	1	0	1	0	1	0	0
103733	734	042B02	Vha16-1	FBgn0004145					1	1	1	0	2	0	0	0	0	0	0	0	0	0	0	0	0	0	0	0	0	2	0	0	0	0	0	2	0	0	0	0	0	0	0	1	0	1	0	2	0
103734	737	013A05	hiw	FBgn0030600					1	1	1	0	1	2	0	0	0	0	1	1	0	2	0	0	0	0	0	0	0	2	0	0	0	0	0	0	0	0	0	0	0	0	0	0	1	1	0	0	0
103735	738	045D05	prel	FBgn0033413					1	0	1	1	1	1	0	0	0	0	1	1	0	1	0	0	0	0	0	0	0	0	0	0	0	0	0	0	0	0	0	0	0	2	1	0	1	0	1	0	0
103736	739	007C09	l(1)G0193	FBgn0027280					1	1	1	0	1	1	0	0	0	0	0	0	0	0	0	0	0	0	0	2	0	0	0	0	0	0	0	0	0	0	0	0	0	2	0	0	1	0	1	0	0
103737	740	038E01	CG17470	FBgn0032869	CG2608	FBgn0032870	CG2488	FBgn0016054	1	1	1	1	1	1	1	1	0	0	1	1	0	1	0	0	0	0	0	2	1	0	0	0	0	0	1	0	0	0	0	0	0	1	0	0	1	0	2	0	0
103738	741	046C10	Mef2	FBgn0011656	CG15863	FBgn0033467	Pal1	FBgn0033466	1	1	0	0	0	0	1	1	0	0	1	1	0	0	0	0	0	0	0	0	0	0	0	0	0	1	0	0	0	0	1	1	0	0	0	0	0	0	0	0	0
103740	747	005C02	CG11985	FBgn0040534					1	1	1	1	0	0	0	0	0	0	1	1	0	0	0	0	0	0	0	0	0	0	0	2	0	1	0	0	0	0	0	0	0	0	0	1	0	1	0	2	0
103742	749	051B07	Su(var)2-HP	FBgn0026427	Sec61-beta	FBgn0010638	CG12863	FBgn0033948	1	1	0	0	1	1	1	1	0	0	0	0	0	1	0	0	0	0	0	0	1	2	0	0	0	0	1	2	0	0	0	0	0	0	0	0	0	0	0	0	0
103743	750	025F03	CG31646	FBgn0051646					1	0	1	0	1	0	0	0	0	0	0	0	0	0	0	0	0	0	0	0	0	0	0	0	0	0	0	0	0	0	0	0	0	0	0	0	0	1	0	0	0
103745	753	077A01-077A02	CG42833	FBgn0262022	obst-F	FBgn0036947	CG42674	FBgn0261556	1	1	1	0	1	0	0	0	0	0	0	1	0	0	0	0	0	0	0	0	0	1	0	0	1	0	1	1	0	0	0	0	0	2	0	0	0	0	0	0	0
103746	755	055B05	Spn6	FBgn0028983					1	1	1	1	1	1	1	1	0	0	0	0	0	1	0	0	0	0	0	2	1	0	0	0	1	0	1	0	0	0	0	0	0	1	0	0	0	0	0	0	0
103748	760	057F09	HmgD	FBgn0004362					1	1	1	1	0	1	0	1	0	0	0	0	1	1	0	0	0	0	1	1	0	0	0	0	0	0	0	0	0	0	0	0	1	1	0	0	0	0	0	0	0
103750	764	052B02	CG42524	FBgn0260429	fus	FBgn0023441			1	0	1	0	1	2	0	0	0	0	0	0	0	2	0	1	0	0	0	0	0	0	0	0	0	0	0	0	0	0	0	0	0	0	0	1	0	1	0	2	0
103755	722	042C06	CG3409	FBgn0033095					1	1	1	0	1	1	0	0	0	0	1	1	0	1	0	0	0	0	0	0	0	2	0	0	1	1	0	2	0	0	0	0	0	0	0	1	0	0	0	0	0
103756	775	033A02	crol	FBgn0020309					1	1	0	0	0	0	0	0	0	0	1	1	0	0	0	0	0	0	0	1	0	0	0	0	1	0	1	0	0	0	0	0	0	0	0	0	0	0	0	0	0
103758	779	001D02	TRAM	FBgn0040340					1	1	1	0	0	0	0	1	0	0	1	1	0	1	0	0	0	0	0	2	0	0	0	0	0	0	0	0	0	0	0	0	0	1	1	0	1	0	1	0	0
103759	781	011A11	CG42258	FBgn0259143					1	1	1	1	1	1	0	0	0	0	0	0	0	0	0	0	0	0	0	2	0	0	0	0	0	0	0	0	0	0	0	0	0	1	0	0	0	0	0	0	0
103761	784	050F01	Shroom	FBgn0085408	tej	FBgn0033921	Ih	FBgn0028428	1	1	1	0	0	0	0	0	0	0	0	0	0	1	0	0	0	0	0	2	1	0	0	0	0	0	1	0	0	0	0	0	0	1	1	0	1	0	3	0	1
103762	785	050F06	CG13941	FBgn0033928	CG12505	FBgn0033926			1	1	1	0	1	1	1	1	0	0	0	0	0	1	0	0	0	0	0	0	1	0	0	0	0	0	1	0	0	0	0	0	0	2	0	0	0	0	0	0	0
103763	786	027C04	xl6	FBgn0028554					1	0	1	0	0	0	1	1	0	0	0	1	0	1	0	0	0	0	0	0	0	0	0	0	0	0	0	0	0	0	0	0	0	2	0	0	0	0	0	0	0
103764	792	049F07	Kdm4B	FBgn0053182					1	1	0	0	0	0	1	0	1	0	0	0	0	0	0	0	0	0	0	0	0	0	0	0	0	1	0	0	0	0	0	0	0	0	0	0	0	0	0	0	0
103765	795	068A07	Sod	FBgn0003462					1	1	1	0	1	1	0	0	0	0	1	0	0	1	0	0	0	0	0	1	1	0	0	0	0	0	1	0	0	0	0	0	1	1	0	0	0	0	0	0	0
103766	796	030A02	tai	FBgn0041092					0	1	1	1	0	0	0	0	0	0	0	0	0	0	0	0	0	0	1	1	0	0	0	0	0	0	0	0	0	0	0	0	0	1	1	0	1	0	1	0	0
103767	800	005A10	CG42265	FBgn0259150	CG4119	FBgn0028474	Sirt4	FBgn0029783	1	1	1	0	1	1	0	0	0	0	0	0	0	0	0	0	0	0	0	0	0	2	0	0	0	0	0	2	0	1	0	0	0	0	0	0	0	1	0	2	0
103768	802	066B07	CdsA	FBgn0010350					1	1	1	1	1	1	1	0	0	0	0	0	0	0	0	0	0	0	0	2	0	0	0	0	0	0	0	0	0	0	0	0	0	1	1	0	1	0	1	0	0
103770	806	087A0	CG18547	FBgn0037973					1	1	1	0	0	0	0	0	0	0	0	1	2	1	0	0	0	0	0	0	0	2	0	0	0	0	0	2	0	0	0	0	0	0	0	0	0	1	0	2	0
103771	807	004E02	CG32767	FBgn0052767					1	1	1	0	0	0	0	0	0	0	1	1	0	0	0	0	0	0	0	0	0	2	0	0	0	0	0	2	0	0	0	0	0	0	0	1	0	1	0	2	0
103772	811	019E07	bves	FBgn0031150					1	1	1	0	0	0	1	1	0	0	0	1	0	2	0	0	0	0	0	0	0	2	0	0	0	1	0	2	0	0	0	0	0	2	0	0	1	0	1	0	0
103780	829	039E07	Ef2b	FBgn0000559					1	1	1	1	1	1	1	1	0	0	0	0	1	1	0	0	0	0	0	1	0	0	1	0	0	0	1	0	1	0	0	0	0	0	0	1	0	1	0	2	0
103783	837	039E06	cul-2	FBgn0082576	CG2225	FBgn0032957	CG43144	FBgn0262620	1	1	1	1	0	1	1	0	0	1	0	1	0	1	0	0	0	0	0	0	1	2	0	0	0	0	1	2	0	0	0	0	0	2	1	0	1	0	1	0	0
103784	840	056A02	CG18605	FBgn0034411					1	0	0	0	1	1	1	1	0	0	0	0	0	0	0	0	0	1	0	0	0	0	0	0	0	0	0	0	0	0	0	0	0	0	0	0	0	0	0	0	0
103785	843	078C01	chb	FBgn0021760					1	1	0	0	0	0	0	0	0	0	1	1	0	0	2	0	0	0	0	0	0	2	0	0	0	0	0	2	0	0	0	0	0	0	0	0	0	0	0	0	0
103787	846	070C06	CG32137	FBgn0052137	Gl	FBgn0001108			1	1	1	1	4	1	0	0	0	0	0	1	0	1	0	0	0	0	0	0	0	0	0	0	1	1	0	0	0	0	0	0	0	0	0	0	0	0	0	0	0
103792	859	001B08	arg	Fbgn0023535					1	1	1	1	1	1	1	0	0	0	0	1	0	0	0	0	0	0	0	1	0	0	1	0	0	0	0	0	0	0	0	0	0	2	0	0	1	0	1	0	0
103795	864	046C01	CG12744	FBgn0033459					1	1	1	0	4	1	1	1	1	0	0	0	0	1	0	0	0	0	0	2	2	0	0	0	0	0	2	0	0	0	0	0	0	0	0	1	0	1	1	2	0
103797	870	023C05	CG3523	FBgn0027571					1	1	1	1	0	1	0	0	0	0	1	1	0	1	0	0	0	0	0	0	0	0	1	1	1	0	1	1	0	1	0	0	0	1	1	0	1	0	1	0	0
103798	872	003E07	tlk	FBgn0086899					1	1	1	0	1	1	0	0	0	0	1	1	0	1	0	0	0	0	0	1	1	0	0	0	0	0	1	0	0	0	0	0	0	2	0	0	1	0	1	0	0
103799	873	029A03	Btk29A	FBgn0003502					1	1	1	1	0	4	0	1	0	0	1	1	0	1	0	0	0	0	0	2	1	0	0	0	0	0	1	0	0	0	0	0	0	0	0	0	1	0	0	1	0
103800	877	050C23	CG6701	FBgn0033889					0	1	1	1	0	0	0	0	0	0	0	0	0	0	0	0	0	0	0	0	0	2	0	0	0	0	0	2	0	0	0	0	0	2	0	0	0	0	2	0	0
103801	881	094B02	CG33099	FBgn0053099	CG33093	FBgn0053093	CG5326	FBgn0038983	0	1	1	1	0	0	0	0	0	0	0	0	0	0	0	0	0	0	0	0	0	2	0	0	0	0	1	2	0	0	0	0	0	2	0	0	0	0	0	0	1
103802	882	044E03	stmA	FBgn0086784					1	1	1	1	1	1	0	0	0	0	1	1	0	1	0	0	0	0	0	2	1	0	0	0	0	0	1	0	0	0	0	0	0	2	1	0	1	0	1	0	0
103803	883	044D03	Cyp6a14	FBgn0033302	Cyp6a15Psi	FBgn0040017	Cyp6a13	FBgn0033304	1	1	1	0	0	1	0	0	0	0	1	1	0	1	0	0	0	0	0	0	0	2	0	0	0	1	1	2	0	0	0	1	0	0	0	1	0	1	1	2	0
103806	893	013E14	Graf	FBgn0030685					1	1	1	1	0	0	0	0	0	0	1	1	0	0	0	0	0	0	0	2	0	0	0	0	0	0	0	0	0	0	0	0	1	1	0	0	0	0	0	0	0
103808	896	076D04	Mi-2	FBgn0262519					1	1	1	1	0	0	0	0	0	0	0	1	0	0	0	0	0	0	0	0	0	2	0	0	0	0	0	2	0	0	0	0	0	0	0	1	0	0	0	2	0
103809	897	049D04-049D06	CG17574	FBgn0033777	bic	FBgn0000181	CG30486	FBgn0050486	0	1	1	0	0	0	0	0	0	0	0	0	0	0	0	0	0	0	0	0	0	2	0	0	0	0	2	0	0	0	0	0	0	2	1	0	1	0	1	0	0
103810	898	043A02	Ady43A	FBgn0026602	Gadd45	FBgn0033153			1	1	1	1	4	1	0	0	0	0	0	0	2	1	0	0	0	0	0	0	1	1	0	0	0	0	2	2	0	0	0	0	0	2	0	0	1	0	3	0	0
103811	902	042E01	vimar	FBgn0022960					1	1	1	0	4	4	1	1	0	1	0	0	0	2	0	0	0	1	0	0	0	0	0	0	0	0	1	1	0	0	0	0	0	0	0	0	0	0	0	0	0
103812	907	037B13	Lim3	FBgn0002023					0	0	1	0	0	0	0	0	0	0	0	0	0	0	0	0	0	0	0	0	0	0	0	0	0	0	0	0	0	0	0	0	0	0	0	0	0	0	0	2	0
103813	908	059F05	l(2)not	FBgn0011297					1	1	1	0	0	1	1	1	0	0	0	0	0	2	0	0	0	0	0	0	0	0	0	0	1	1	0	2	0	0	0	1	0	0	0	0	0	0	0	2	0
103814	909	071B04	CTPsyn	FBgn0262707					1	1	1	0	1	1	0	0	0	0	0	1	0	1	0	0	0	0	0	0	0	2	0	0	0	0	1	2	0	0	0	0	0	0	0	0	1	0	1	0	0
103815	911	045A12	Prp38	FBgn0050342					1	1	1	0	0	0	0	0	0	0	1	1	0	0	0	0	0	0	0	0	1	0	0	2	1	0	1	1	0	1	0	0	0	1	0	0	0	0	1	0	0
103816	916	094E07	cnc	FBgn0262975					1	1	1	0	1	1	0	0	0	0	0	0	0	1	0	0	0	0	0	0	0	2	0	0	0	0	0	2	0	0	0	1	0	1	0	0	0	0	0	0	0
103818	921	083A07	Itp-r83A	FBgn0010051					1	1	1	0	0	0	0	0	0	0	1	1	0	0	0	0	0	0	0	2	0	0	0	0	0	0	0	0	0	0	0	0	0	2	0	0	1	0	1	0	0
103819	927	076D05	RhoGDI	FBgn0036921					1	1	1	0	1	1	0	0	0	0	0	0	0	2	0	0	0	0	0	0	0	1	0	0	0	0	0	1	0	0	1	1	0	0	0	0	1	0	0	2	0
103820	932	002D02	ph-d	FBgn0004860	ph-p	FBgn0004861			1	1	1	1	1	1	0	0	0	0	0	0	1	1	0	0	0	0	1	1	0	0	0	0	0	0	0	0	0	0	0	0	0	1	0	0	0	0	3	0	0
103821	933	055E01	CG42697	FBgn0261587	CG30115	FBgn0050115	CG10927	FBgn0034360	1	1	1	1	2	0	0	0	0	0	0	0	2	2	0	0	0	0	0	2	0	0	0	0	1	0	0	0	0	0	0	0	0	0	0	1	1	0	0	2	0
103824	938	007D02	Tbh	FBgn0010329					1	0	0	0	1	1	0	0	0	0	0	0	0	0	0	0	0	0	0	0	0	0	0	0	0	0	0	0	0	0	0	0	0	0	0	0	0	0	0	0	0
103825	941	013F17	tay	FBgn0260938					1	1	1	1	0	1	0	0	0	0	1	1	0	1	0	0	0	0	0	2	1	0	0	0	0	0	1	0	1	0	0	0	0	1	0	0	0	0	1	0	0
103826	942	004C12	Pp2C1	FBgn0022768					1	1	1	0	1	1	0	0	0	0	0	1	0	1	0	0	0	0	0	0	0	2	0	0	0	1	0	2	0	0	0	0	0	0	0	0	0	0	0	2	0
103827	944	065F07	sec63	FBgn0035771					1	1	1	1	0	0	0	0	0	0	1	1	0	0	0	0	0	0	0	0	0	2	0	0	0	0	0	2	0	0	0	0	0	0	0	1	0	1	0	2	0
103828	946	018C08	Pfrx	FBgn0027621					1	1	1	0	0	0	1	0	0	0	0	1	0	0	0	0	0	0	0	0	0	0	0	0	0	0	0	2	0	0	0	0	0	0	0	1	0	0	0	2	0
103830	949	056D08	betaTub56D	FBgn0003887	CG7744	FBgn0034447			1	1	1	1	1	1	1	0	0	0	1	1	0	1	0	0	0	0	0	1	1	0	0	0	0	0	1	0	0	0	0	0	1	1	0	0	0	0	0	0	0
103831	951	007B06	CHES-1-like	FBgn0029504	CG15478	FBgn0029955			0	0	0	0	0	0	0	0	0	0	0	0	0	0	0	0	0	0	0	0	0	0	0	0	0	0	0	0	0	0	0	0	0	0	0	0	0	0	0	0	0
103832	953	049F10	CG8490	FBgn0033715					1	1	1	1	0	0	0	0	0	0	1	1	0	0	0	0	0	0	0	2	0	0	0	0	0	0	0	0	0	0	0	0	0	1	1	1	1	1	1	1	0
103833	957	052D12	CG8370	FBgn0034060					1	1	1	0	0	0	1	0	0	0	1	1	0	0	0	0	0	0	0	2	0	0	0	0	0	0	0	0	0	0	0	0	0	2	0	0	0	0	0	0	0
103834	958	010F07	Sclp	FBgn0030357					1	1	1	1	0	0	0	0	0	0	1	1	0	0	0	0	0	0	0	2	0	0	1	0	0	0	2	0	0	0	0	0	0	2	0	0	0	0	0	0	1
103836	965	004E02	rg	FBgn0086911					1	1	0	0	1	1	0	0	0	0	0	0	0	0	0	0	0	0	0	0	0	2	0	0	0	0	0	2	0	0	0	0	0	0	0	0	0	0	0	0	0
103839	970	086E18	l(3)neo38	FBgn0086910					1	1	0	1	1	1	0	1	0	0	0	0	0	0	0	0	0	0	0	0	1	2	0	0	0	0	1	2	0	0	0	0	0	0	0	0	0	0	0	0	0
103840	971	070F04	Trl	FBgn0013263					1	1	1	0	0	0	0	0	0	0	0	0	1	0	0	0	0	0	1	1	0	0	0	0	0	0	0	0	0	0	0	0	0	0	0	0	0	0	1	2	0
103841	972	007F04	Trf4-1	FBgn0030049					1	1	1	0	4	0	0	0	0	0	0	1	0	0	0	0	0	0	0	2	0	0	0	0	0	0	0	0	0	0	0	0	0	0	0	0	0	1	0	2	0
103842	973	001A01	CG3777	FBgn0024989					1	1	1	0	1	1	0	0	0	0	0	0	0	1	0	0	0	0	0	0	0	2	0	0	0	0	0	2	0	0	0	0	0	0	0	0	0	1	0	2	0
103843	974	089E11	Dad	FBgn0020493					1	1	1	1	4	0	1	0	0	0	1	1	0	0	0	0	0	0	0	2	1	0	0	0	0	0	1	0	1	0	1	0	0	1	1	0	1	0	3	0	0
103844	975	013F01	sd	FBgn0003345					1	1	1	1	1	0	0	0	0	0	1	0	0	0	0	0	0	0	0	1	1	0	0	0	1	0	1	0	0	0	0	0	0	1	0	0	0	0	3	0	0
103845	977	07D018	sdt	FBgn0261873					1	1	1	1	0	0	0	0	0	0	1	1	0	1	0	0	0	0	0	2	1	0	0	0	0	0	1	0	0	0	0	0	0	1	0	0	0	0	0	0	0
103846	978	002F05	CG2865	FBgn0023526					1	1	1	1	0	0	0	0	0	0	1	1	0	0	0	0	0	0	0	1	0	0	0	0	1	1	0	0	0	0	0	0	0	1	0	0	1	0	1	0	0
103848	987	001D02	CG14632	FBgn0029538					1	1	1	1	4	1	0	0	1	0	0	0	0	1	0	0	0	0	0	0	0	2	0	0	0	0	2	2	0	0	0	1	0	0	1	1	0	0	3	3	0
103849	990	047A13	lola	FBgn0005630					1	1	1	0	4	1	0	0	0	0	0	0	0	1	0	0	0	0	0	0	0	0	1	1	0	0	2	2	0	0	0	0	0	0	0	0	0	1	0	2	0
103850	991	069D06	Ptp69D	FBgn0014007					1	1	1	0	0	0	0	0	0	0	0	1	0	0	0	0	0	0	0	0	1	0	0	0	0	0	0	0	0	0	0	1	0	0	0	0	0	0	0	0	0
103854	1005	006C01	pigs	FBgn0029881					1	1	1	1	1	0	0	0	0	0	0	1	4	0	0	0	0	0	0	2	0	0	0	0	1	0	1	0	0	0	0	0	0	0	0	0	1	1	0	0	0
103857	1015	017C07	Rip11	FBgn0027335					1	0	1	1	0	0	1	1	0	0	0	0	0	0	0	0	0	0	0	0	0	0	0	0	0	0	0	0	0	0	0	0	0	0	0	0	0	1	3	3	0
103859	1032	011D01	Pde9	FBgn0259171					1	1	0	0	1	1	0	0	0	0	0	0	0	0	0	0	0	0	0	0	0	2	0	0	0	0	0	2	0	0	0	0	0	0	0	0	0	0	0	0	0
103860	1033	015A01	4-Sep	FBgn0259923	CG4678	FBgn0030778	CG9676	FBgn0030773	1	1	0	1	4	1	0	0	0	0	1	1	0	0	0	0	0	0	0	1	0	0	1	0	0	0	0	0	0	0	0	0	0	0	0	0	0	0	0	0	0
103862	1036	007A08-007B02	CG1677	FBgn0029941	brk	FBgn0024250	unc-119	FBgn0025549	1	1	0	0	4	1	0	0	0	0	0	1	1	1	0	0	0	0	0	2	1	0	0	0	0	0	1	0	0	0	0	0	0	0	0	0	0	0	0	0	0
103863	1039	018B01	CG7990	FBgn0030997	Ulp1	FBgn0027603	CG14194	FBgn0030996	1	1	1	0	1	1	0	0	0	0	0	0	2	2	0	0	0	0	0	0	0	2	0	0	0	0	0	2	0	0	0	0	0	0	0	0	0	1	0	2	0
103864	1043	004F09	spoon	FBgn0263987					0	1	1	0	0	0	0	0	0	0	0	0	0	0	0	0	0	0	0	0	0	2	0	0	1	0	0	2	0	0	0	0	0	0	0	0	0	0	0	0	0
103866	1045	007A03	CG9650	FBgn0029939					0	0	1	0	0	0	0	0	0	0	0	0	0	0	0	0	0	0	0	0	0	0	0	0	0	0	0	0	0	0	0	0	0	0	0	0	0	0	0	0	0
103867	1046	002D03	ph-p	FBgn0004861					0	0	0	0	0	0	0	0	0	0	0	0	0	0	0	0	0	0	0	0	0	0	0	0	0	0	0	0	0	0	0	0	0	0	0	0	0	0	0	0	0
103869	1055	015A10	CG4829	FBgn0030796					1	0	1	0	1	1	0	0	0	0	0	0	0	0	0	0	0	0	0	0	0	0	0	0	0	0	0	0	0	0	0	0	0	0	0	0	0	0	0	0	0
103870	1058	010A04	CG2061	FBgn0027498					1	0	1	0	4	0	0	0	0	0	0	0	0	0	0	0	0	0	0	0	0	0	0	0	0	0	0	0	0	0	0	0	0	0	0	0	0	0	0	2	0
103871	1059	013C05	CG6340	FBgn0030648					0	0	1	0	0	0	0	0	0	0	0	0	0	0	0	0	0	0	0	0	0	0	0	0	0	0	0	0	0	0	0	0	0	0	0	0	0	0	0	0	0
103872	1062	003F01	CG2947	FBgn0029676	tlk	FBgn0086899			1	0	1	1	0	0	0	0	0	0	1	0	0	0	0	0	0	0	0	0	0	0	0	0	0	0	0	0	0	0	0	0	0	0	0	1	0	1	0	2	0
103874	1065	035C05	X11L_	FBgn0052677	CG9806	FBgn0030222			1	1	1	0	1	0	0	1	0	0	0	0	0	2	0	0	0	0	0	0	0	0	1	1	0	0	0	1	0	0	0	0	0	0	0	0	0	1	0	2	0
103875	1073	011B01	Cpr11B	FBgn0030398	CG43921	FBgn0264542			1	0	0	0	1	1	0	0	0	0	0	0	0	0	0	0	0	0	0	0	0	0	0	0	0	0	0	0	0	0	0	0	0	0	0	0	0	0	0	0	0
103876	1076	015F08	Fim	FBgn0024238					1	0	1	0	0	0	0	0	0	0	0	1	0	0	0	0	0	0	0	0	0	0	0	0	0	0	0	0	0	0	0	0	0	0	0	0	0	0	0	0	0
103877	1079	003A01	llp6	FBgn0034163					1	1	1	1	0	0	0	0	0	0	1	1	0	0	0	0	0	0	0	2	0	0	0	0	1	0	0	0	0	0	0	0	0	0	0	0	0	1	0	2	0
103878	1083	003E06	Rala	FBgn0015286					1	1	1	0	0	0	0	0	0	0	1	1	0	0	0	0	0	0	0	0	0	0	0	0	0	0	0	0	0	0	1	1	0	0	0	0	0	0	0	0	0
103880	1093	008C04	CG10962	FBgn0030073					1	0	0	0	0	0	0	0	0	0	1	1	0	1	0	0	0	1	0	0	0	0	0	0	0	0	0	0	0	0	0	0	0	0	0	0	0	0	0	0	0
103881	1094	018F03	pico	FBgn0261811					1	1	0	0	1	1	0	0	0	0	1	1	0	0	0	0	1	0	0	0	0	0	0	2	0	1	1	1	0	0	0	0	0	0	0	0	0	0	0	0	0
103882	1098	003E06	tlk	FBgn0086899					1	1	1	0	0	0	0	0	0	0	1	1	0	1	0	0	0	0	0	2	0	0	0	0	0	0	1	0	0	0	0	0	0	2	0	0	0	0	1	0	0
103884	1104	048C05	ERp60	FBgn0033663					1	1	0	1	0	1	1	0	0	0	0	0	0	0	0	0	0	0	0	0	0	0	0	2	0	0	0	0	0	0	0	0	0	0	0	0	0	0	0	0	0
103885	1106	035D04	Gli	FBgn0001987	CG3793	FBgn0028507			1	1	1	0	0	1	0	0	0	0	0	0	0	1	0	0	0	0	0	1	1	0	0	0	0	0	1	0	0	0	1	0	0	1	0	0	1	0	1	0	0
103887	1111	055E06	SP2637	FBgn0034371					1	1	1	0	0	0	0	0	0	0	1	1	0	0	0	0	0	0	0	0	0	2	0	0	1	1	2	2	0	0	0	0	0	0	0	1	0	1	0	2	0
103888	1112	034D01	CG9008	FBgn0028540	p38b	FBgn0024846	CG16890	FBgn0028932	1	1	1	0	0	4	0	0	0	0	0	1	0	2	0	0	0	0	0	0	0	2	0	0	0	0	1	1	0	0	0	0	0	0	0	0	0	0	3	3	0
103889	1113	042D04	CG30158	FBgn0050158					1	0	0	0	0	0	1	1	0	0	0	0	0	0	0	0	0	0	0	0	0	0	0	0	0	0	0	0	0	0	0	0	0	0	0	0	0	0	0	0	0
103890	1115	021B07	mbm	FBgn0086912					1	1	1	1	4	1	0	0	0	0	1	1	0	1	0	0	0	0	0	1	2	0	0	0	0	0	2	0	0	0	0	0	1	1	0	0	0	0	0	0	0
103893	1124	050D01	mam	FBgn0002643					1	1	1	0	1	1	0	0	0	0	0	0	0	1	0	0	0	0	0	0	0	2	0	0	1	1	0	2	0	0	0	0	0	0	0	0	0	1	0	0	0
103894	1126	055B09	lolal	FBgn0022238					1	1	1	1	0	1	0	0	1	1	0	1	0	0	0	0	0	0	0	0	0	2	0	0	0	0	0	2	0	0	0	0	0	0	0	1	0	1	0	2	0
103895	1127	038C02	No Gene						1	1	0	1	4	0	1	1	0	0	0	0	0	1	0	0	0	0	0	0	0	2	0	0	0	0	0	2	0	0	0	0	0	0	0	0	0	0	0	0	0
103896	1128	039E03	CG2201	FBgn0032955					1	1	1	1	1	0	0	0	0	0	0	0	1	1	0	0	0	0	0	2	0	0	0	0	0	0	0	0	0	0	0	0	0	1	0	0	0	0	2	0	0
103897	1130	026B03	CG9098	FBgn0031762					1	0	0	0	0	0	0	0	0	0	0	0	0	2	0	0	0	0	0	0	0	0	0	0	0	0	0	0	0	0	0	0	0	0	0	0	0	0	0	0	0
103898	1131	038B01	CG10659	FBgn0032839	CG13966	FBgn0032838	CG40262	FBgn0058262	1	1	1	0	0	0	1	1	1	1	0	0	4	1	0	0	0	0	0	2	0	0	0	0	0	0	2	0	0	0	0	0	0	0	0	0	1	1	3	1	0
103901	1143	032D20	Samuel	FBgn0032330	CG14915	FBgn0032335			1	1	1	1	0	0	0	0	0	0	1	1	0	0	0	0	0	0	0	2	2	0	0	0	0	0	0	0	0	0	0	0	0	1	0	0	0	0	3	0	0
103902	1147	047B09	CG7220	FBgn0033544					1	1	0	1	1	0	0	0	0	0	0	0	0	0	0	0	0	0	0	0	0	2	0	0	0	0	0	2	0	0	0	0	0	0	0	0	0	0	0	0	0
103903	1150	048B05	Roc2	FBgn0044020					1	1	1	1	0	0	0	0	0	0	1	1	0	0	0	0	0	0	0	0	0	2	0	0	0	0	0	2	0	0	0	0	0	0	0	1	0	1	2	1	0
103904	1153	048A03	Tou	FBgn0033636					1	1	1	1	4	1	0	0	0	0	1	1	0	0	0	0	0	0	0	2	0	0	0	0	1	0	1	0	0	0	0	0	0	2	0	0	0	0	0	0	0
103906	1160	053E02	mute	FBgn0085444					1	1	1	0	0	0	0	0	0	0	0	0	2	2	0	0	0	0	0	0	0	2	0	0	0	0	0	2	0	0	0	1	0	0	0	1	0	1	1	2	0
103907	1161	054B40	mbl	FBgn0261642					1	0	0	0	4	4	0	0	0	0	0	0	0	0	0	0	0	0	0	0	0	0	0	0	0	0	0	0	0	0	0	0	0	0	0	0	0	0	0	0	0
103908	1162	047F08	Sprite	FBgn0082585	CG7759	FBgn0033633			1	1	1	1	0	1	1	1	1	0	0	0	0	2	0	1	0	1	0	0	0	2	0	0	0	0	0	2	0	0	0	0	0	0	0	1	1	1	0	2	0
103910	1165	028F01	CG8451	FBgn0031998	CG8419	FBgn0031999			1	1	1	0	0	0	0	0	0	0	1	1	0	0	0	0	0	0	0	0	0	2	0	0	0	1	0	2	0	0	0	0	0	0	0	0	0	1	0	2	0
103911	1166	054D50	Sema-1b	FBgn0016059					0	0	0	0	0	0	0	0	0	0	0	0	0	0	0	0	0	0	0	0	0	0	0	0	0	0	0	0	0	0	0	0	0	0	0	0	0	0	0	0	0
103913	1169	021B01	dbr	FBgn0067779					1	1	1	1	1	1	0	0	0	0	0	0	0	0	0	0	0	0	0	1	1	0	0	0	0	0	1	0	0	0	0	0	0	1	0	0	1	0	1	0	0
103914	1170	049F04	TppII	FBgn0020370					1	1	1	0	4	1	0	0	0	0	0	0	0	1	0	0	0	0	0	0	0	2	0	0	0	0	0	2	0	0	0	1	0	0	0	1	0	1	0	2	0
103915	1175	025D01	tkv	FBgn0003716					1	1	1	1	0	0	0	0	0	0	1	1	1	0	0	0	0	0	0	1	0	0	0	0	0	0	2	0	0	0	0	0	0	1	0	0	1	0	0	0	0
103917	1178	036A3	CG5953	FBgn0032587					1	1	1	1	0	4	0	0	0	0	0	0	1	1	0	0	0	0	0	2	1	0	0	0	0	0	1	0	0	0	0	0	0	2	0	0	0	0	3	0	0
103918	1180	050C06	CG6543	FBgn0033879					1	1	1	1	0	1	0	0	0	0	1	1	0	1	0	0	0	0	0	1	0	0	0	0	0	0	0	0	0	0	0	0	0	1	1	0	1	0	1	0	0
103919	1181	034E01	cenG1A	FBgn0028509					1	1	1	0	1	1	0	0	0	0	0	0	1	1	0	0	0	0	0	0	0	0	0	0	1	0	0	2	0	0	0	0	0	0	0	1	0	1	0	2	0
103920	1183	026D01	CG42368	FBgn0259714	CG13982	FBgn0031811			1	1	1	0	0	0	0	0	0	0	1	1	0	0	0	0	0	0	0	2	0	0	0	0	0	0	0	0	1	0	0	0	0	0	0	0	0	0	0	2	0
103921	1184	057A07	CG9945	FBgn0034527					1	1	1	1	0	1	0	0	0	0	1	1	0	1	0	0	0	0	0	2	0	0	0	0	0	0	0	0	0	0	0	0	0	1	0	1	1	1	1	2	0
103922	1185	055F08	Jheh3	FBgn0034496	CG43069	FBgn0262479			1	1	1	0	4	4	0	0	0	0	0	0	0	1	0	0	0	0	0	0	0	2	0	0	0	0	0	2	0	0	0	1	0	0	0	0	0	0	0	0	0
103923	1191	052A10	CG8187	FBgn0034027	eIF2B-_	FBgn0034029			1	1	1	1	1	4	0	0	0	0	0	1	0	2	0	0	0	0	0	0	0	1	0	0	0	0	0	2	0	0	0	1	0	0	0	0	0	0	0	0	0
103927	1197	054B16	veil	FBgn0034225					1	1	1	0	0	1	0	0	0	0	0	0	0	1	0	0	0	0	0	2	0	0	0	0	0	0	0	0	0	0	0	0	0	0	0	0	0	1	1	2	0
103928	1201	033D02	rho-6	FBgn0032415	Gr33a	FBgn0032416			1	1	1	1	0	0	0	0	0	0	1	1	0	0	0	0	0	0	0	2	0	0	0	0	1	0	1	0	0	0	0	0	0	0	0	0	0	1	1	2	0
103929	1202	044E01	Acsl	FBgn0010609					1	1	1	0	0	0	0	0	0	0	1	1	0	0	0	0	0	0	0	2	0	0	0	0	0	0	0	0	0	0	0	0	0	0	0	0	0	1	0	2	0
103930	1205	031A02	Pen	FBgn0011823					1	1	1	0	0	0	0	0	0	0	1	1	0	0	0	0	0	0	0	2	0	0	1	0	0	0	1	0	1	0	1	0	0	2	0	0	1	0	3	0	0
103931	1206	058C01	arc	FBgn0000008					1	1	1	0	4	4	1	1	0	0	0	0	0	0	0	2	0	0	0	0	0	2	0	0	0	0	1	2	0	0	0	0	0	0	0	0	0	1	3	2	0
103933	1208	022A03	CG14351	FBgn0031349					1	1	1	0	1	1	0	0	0	0	0	0	0	0	0	0	0	0	0	0	0	2	0	0	0	0	0	2	0	0	1	1	0	0	0	0	0	1	1	3	0
103934	1210	043F01	lin19	FBgn0015509					1	0	1	0	1	1	0	0	0	0	0	0	0	0	0	0	0	0	0	0	0	0	0	0	0	0	0	0	0	0	0	0	0	0	0	0	0	0	0	0	0
103935	1211	042C01	jing	FBgn0086655	CG33919	FBgn0053919	Vha16-1	FBgn0262736	1	1	1	1	0	1	1	0	0	0	1	1	0	0	0	0	0	0	0	0	0	2	0	0	0	0	0	2	0	0	0	0	0	0	0	1	1	1	1	2	0
103936	1212	051E02	chn	FBgn0015371					1	1	1	1	0	0	0	0	0	0	0	0	1	0	0	0	0	0	0	2	0	0	0	0	0	0	1	0	1	0	0	0	1	1	0	0	0	0	3	0	0
103937	1214	026D07	CG16947	FBgn0031816	CG9531	FBgn0031817	mmy	FBgn0259749	1	1	0	0	0	0	0	0	0	0	1	1	0	0	0	0	0	0	0	0	0	0	0	0	1	1	0	0	0	0	0	0	0	0	0	0	0	0	0	0	0
103938	1215	048D08	CG8321	FBgn0033677					1	0	1	0	1	0	0	0	0	0	0	0	0	0	0	0	0	0	0	0	0	0	0	0	0	0	0	0	0	0	0	0	0	0	0	0	0	1	0	2	0
103941	1219	044B09	CG14757	FBgn0033274	Mlh1	FBgn0011659			1	1	1	1	1	1	0	0	0	0	0	0	1	1	0	0	0	0	0	0	0	2	0	0	1	0	0	2	0	0	0	0	0	0	0	1	1	1	2	2	0
103942	1220	025C01	Cg25C	FBgn0000299	vkg	FBgn0016075			1	0	1	0	0	0	0	0	0	0	1	1	1	1	0	0	0	0	0	0	0	0	0	0	0	0	0	0	0	0	0	0	0	0	0	0	0	0	0	0	0
103943	1222	034C04	B4	FBgn0023407		FBgn0259984			1	1	1	0	4	0	0	0	1	0	0	0	0	0	0	0	0	0	0	0	0	2	0	0	0	0	0	2	0	0	0	0	0	1	0	0	0	1	2	2	0
103944	1223	056E03	NG						1	1	1	0	4	0	0	0	0	0	0	0	2	0	0	0	0	0	0	0	0	0	1	0	0	0	0	2	0	0	0	0	0	0	0	1	0	1	0	2	0
103945	1227	039C01	CG8671	FBgn0032938					1	1	1	0	0	1	0	0	0	0	0	0	0	2	0	0	0	0	0	0	0	2	0	0	0	0	0	2	0	0	0	0	0	0	0	1	0	1	0	2	0
103946	1228	036C07	CG15141	FBgn0032635					1	1	1	0	4	1	0	0	0	0	0	0	0	1	0	0	0	0	0	0	0	2	0	0	0	0	0	2	0	0	0	1	0	0	0	1	0	1	0	2	0
103947	1230	043E09	CG2064	FBgn0033205	CG2065	FBgn0033204			1	1	1	1	1	0	0	1	0	0	1	1	0	0	0	0	0	0	0	0	0	2	0	0	0	0	0	2	0	0	0	0	0	0	0	1	0	1	0	2	0
103949	1234	046F06	Hr46	FBgn0000448					1	0	1	0	0	0	0	0	0	0	0	0	0	1	0	0	0	0	0	0	0	0	0	0	0	0	0	0	0	0	0	0	0	0	0	0	0	0	0	0	0
103950	1235	048A03	Egm	FBgn0086712	CG9005	FBgn0033638	tou	FBgn0033636	1	1	1	0	1	1	0	0	0	0	0	0	0	2	0	0	0	0	0	2	0	0	0	0	0	0	0	0	0	0	0	0	0	2	0	0	1	0	1	0	0
103951	1239	052C08	Gpo-1	FBgn0022160					0	0	0	0	0	0	0	0	0	0	0	0	0	0	0	0	0	0	0	0	0	0	0	0	0	0	0	0	0	0	0	0	0	0	0	0	0	0	0	0	0
103953	1243	045D04	wun	FBgn0016078					1	1	1	0	0	0	0	0	0	0	1	1	0	0	0	0	0	0	0	2	0	0	0	0	1	0	0	0	0	0	0	0	0	1	0	0	0	0	0	0	0
103955	1247	026B05	Kr-h1	FBgn0028420					1	1	1	0	0	0	0	0	0	0	1	1	0	0	0	0	0	0	0	0	0	0	0	0	0	0	0	2	0	0	0	0	0	2	0	0	0	0	1	0	0
103957	1251	029F06	CG13101	FBgn0032084	rost	FBgn0011705	CG18662	FBgn0040963	1	0	0	0	0	0	0	0	0	0	1	1	0	0	0	0	0	0	0	0	0	0	0	0	0	0	0	0	0	0	0	0	0	0	0	0	0	0	0	0	0
103961	1257	039D03	nrv3	FBgn0032946					1	1	1	0	0	0	0	0	0	0	1	1	0	0	0	0	0	0	0	0	0	2	0	0	0	0	0	2	0	0	0	0	0	0	0	1	0	1	0	2	0
103963	1273	052F09	mrj	FBgn0034091					1	1	0	0	0	1	0	0	0	0	1	1	0	1	0	0	0	0	0	2	2	0	0	0	1	0	0	0	0	0	0	0	0	0	0	0	0	0	0	0	0
103967	1282	038A03	CdGAPr	FBgn0032821					1	1	1	0	0	0	0	0	0	0	1	1	0	0	0	0	0	0	0	0	0	0	0	0	1	1	0	2	0	0	0	0	0	0	0	0	0	0	0	0	0
103969	1291	086E14	CG42327	FBgn0259227					1	1	0	0	1	4	0	0	0	0	0	0	0	0	0	0	0	0	0	0	0	0	0	0	0	1	0	0	0	0	0	0	0	0	0	0	0	0	0	0	0
103973	1304	070F04	Trl	FBgn0013263					1	1	1	0	1	4	0	0	0	0	0	0	0	0	0	0	0	0	0	0	0	0	0	2	0	0	0	0	0	0	0	0	0	0	0	1	0	1	0	2	0
103974	1305	089D05	Fas1	FBgn0262742					1	1	1	1	1	0	0	0	0	0	0	1	0	0	0	0	0	0	0	0	0	0	1	1	1	0	0	0	0	0	0	0	0	0	0	0	1	1	0	2	0
103975	1306	092B06	CG4538	FBgn0038745					1	1	1	1	0	1	0	0	0	0	1	1	0	1	0	0	0	0	0	2	1	0	0	0	0	0	1	0	0	0	0	0	0	1	1	0	1	0	1	0	0
103976	1307	091A05	koko	FBgn0051232					1	1	1	1	0	0	0	0	0	0	1	1	0	0	0	0	0	0	0	2	0	0	1	0	0	0	1	0	0	0	0	0	0	1	1	0	1	0	1	0	0
103977	1308	066D12	Fhos	FBgn0261259					0	1	1	0	0	0	0	0	0	0	0	0	0	0	0	0	0	0	0	2	0	0	0	0	0	0	0	0	0	0	0	0	0	0	0	1	0	1	3	3	1
103979	1311	084E13	puc	FBgn0243512					1	1	1	1	1	0	0	0	0	0	0	1	0	0	0	0	0	0	0	0	0	2	0	0	0	1	0	2	0	0	0	0	0	0	0	1	0	1	0	2	0
103980	1312	069E04	Atg1	FBgn0260945	Sap130	FBgn0262714	CG32110	FBgn0052110	1	1	1	1	1	0	0	0	0	0	0	1	0	0	0	0	0	0	0	1	1	0	0	0	0	0	1	0	0	0	0	0	0	1	1	0	1	0	3	0	0
103981	1314	084E09	ImpE3	FBgn0001255	CG2747	FBgn0037541	CG10903	FBgn0037543	1	1	1	0	1	0	0	0	0	0	0	0	0	0	0	0	0	0	0	2	0	0	0	0	0	0	0	0	0	0	0	0	0	2	0	0	0	0	1	1	0
103983	1317	088D01	Neu3	FBgn0051314					0	0	0	0	0	0	0	0	0	0	0	0	0	0	0	0	0	0	0	0	0	0	0	0	0	0	0	0	0	0	0	0	0	0	0	0	0	0	0	0	0
103984	1319	082B03	CG31523	FBgn0051523					1	0	1	0	0	4	1	1	0	0	0	1	0	2	0	1	0	0	0	0	0	0	0	0	0	0	0	0	0	0	0	0	0	0	0	0	0	0	0	0	0
103985	1320	061F06	Myo61F	FBgn0010246					1	1	1	0	1	0	0	0	0	0	0	1	0	0	0	0	0	0	0	0	0	0	0	2	0	0	0	2	0	0	0	1	0	0	0	1	0	1	0	3	0
103987	1323	084F10	Gfr	FBgn0037567	Sgt1	FBgn0260939	CG9626	FBgn0037565	1	1	1	0	0	0	0	0	0	0	1	1	0	0	0	0	0	0	0	0	0	2	0	0	0	0	0	2	0	0	0	0	0	0	0	0	0	1	0	1	0
103988	1325	098A01	CG13978	FBgn0039518	sidestep	FBgn0016061			1	0	0	0	1	1	0	0	0	0	0	0	0	2	0	0	0	0	0	0	0	0	0	0	0	0	0	0	0	0	0	0	0	0	0	0	0	0	0	0	0
103989	1326	089A11	Hel89B	FBgn0022787					1	1	1	1	1	1	0	0	0	0	0	0	0	0	0	0	0	0	0	0	0	0	0	0	0	0	0	2	0	0	0	0	0	0	0	0	0	0	0	0	0
103990	1327	096A23	polybromo	FBgn0039227	Ude	FBgn0039226	CG6980	FBgn0039228	1	1	1	1	0	0	0	0	0	0	1	1	0	0	0	0	0	0	0	1	1	0	0	0	0	0	1	0	0	0	0	0	0	1	0	0	1	0	1	0	0
103991	1329	071B01	Reck	FBgn0036463					1	1	1	1	0	0	0	0	0	0	1	1	0	0	0	0	0	0	0	0	0	2	0	0	0	0	0	2	0	0	0	0	0	0	0	1	0	0	0	0	0
103992	1330	084D09	alpha-Est10	FBgn0015569					1	1	1	0	1	0	1	0	0	0	0	0	0	0	0	0	0	0	0	0	0	2	0	0	0	0	0	2	0	0	0	1	0	0	0	0	0	1	0	2	0
103994	1334	067D13	NG						1	1	1	0	0	0	0	0	0	0	0	0	2	0	0	0	0	0	0	2	1	2	0	0	0	0	2	0	0	0	0	0	0	0	0	0	0	0	0	0	0
103996	1337	085D11	CG43674	FBgn0263749					1	0	1	0	0	4	0	0	0	0	1	1	0	0	0	0	0	0	0	0	0	0	0	0	0	0	0	0	0	0	0	0	0	0	0	0	0	0	0	0	0
103997	1338	064A02	scrt	FBgn0004880					1	1	1	0	1	1	0	0	0	0	0	0	0	1	0	0	0	0	0	0	0	2	1	0	0	0	1	2	0	0	0	0	0	0	0	0	0	0	0	2	0
103999	1341	068D02	Sug	FBgn0036191					1	0	0	0	0	0	0	0	0	0	1	0	0	0	0	0	0	0	0	0	0	0	0	0	0	0	0	0	0	0	0	0	0	0	0	0	0	0	0	0	0
104002	1353	066B06	Arp3	FBgn0262716	msk	FBgn0026252	ldbr	FBgn0035838	1	1	1	1	1	1	0	0	0	0	1	1	1	1	0	0	0	0	0	1	1	0	0	0	0	0	1	0	0	0	0	0	1	1	0	0	0	0	0	0	0
104003	1359	080A01	l(3)04053	FBgn0010830					0	0	1	1	0	0	0	0	0	0	0	0	0	0	0	0	0	0	0	0	0	0	0	0	0	0	0	0	0	0	0	0	0	1	1	0	1	0	1	0	0
104004	1362	084F11	Coq2	FBgn0037574	Ctr1B	FBgn0062412			1	0	0	1	1	1	0	0	0	0	0	0	0	0	0	0	0	0	0	0	0	0	0	0	0	0	0	0	0	0	0	0	0	0	0	0	0	0	0	0	0
104005	1366	084F06	RpA-70	FBgn0010173	Mcm2	FBgn0014861			1	1	1	1	1	1	0	0	0	0	1	1	1	1	0	0	0	0	0	2	1	0	0	0	0	0	1	0	0	0	0	0	0	1	1	0	0	0	1	0	0
104006	1369	085D01	pum	FBgn0003165					1	1	1	0	1	4	0	0	0	0	0	0	0	2	0	0	0	0	0	0	0	2	0	0	0	0	0	2	0	0	0	0	0	0	0	1	0	0	3	3	0
104008	1375	54B16	mthl3	FBgn0028956	CG10764	FBgn0034221			1	1	1	0	0	0	0	0	0	0	1	1	0	0	0	0	0	0	0	0	0	2	0	0	1	1	0	2	0	0	0	1	0	0	0	1	0	1	0	2	0
104009	1377	047F08	sprt	FBgn0082585					1	1	1	0	1	1	1	0	1	0	0	0	2	2	0	0	0	1	0	0	0	2	3	0	0	0	0	2	0	0	0	0	0	0	0	1	0	1	0	2	0
104010	1381	043F02	Kdm4A	FBgn0033233	CG8791	FBgn0033234	Or43b	FBgn0026393	0	1	0	0	0	0	0	0	0	0	0	0	0	0	0	0	0	0	0	0	0	2	0	0	0	0	0	0	0	0	0	1	0	0	0	0	0	0	0	0	0
104012	1503	013B06	Top1	FBgn0004924					1	1	1	0	4	4	0	0	0	0	0	0	2	2	0	0	0	0	0	0	0	2	0	0	0	0	0	2	0	0	0	0	0	0	0	0	0	0	0	0	0
104013	1506	001B09-001B10	Appl	FBgn0000108					1	1	0	0	0	0	0	0	0	0	1	1	0	0	0	0	0	0	0	0	0	0	0	0	1	1	0	0	0	0	0	0	0	0	0	0	0	0	0	0	0
104014	1507	012E03	yl	FBgn0004649	CG13403	FBgn0030544	CG11590	FBgn0030545	1	0	1	0	1	1	0	0	0	0	1	1	0	2	0	0	0	0	0	0	0	0	0	0	0	0	0	0	0	0	0	0	0	0	0	0	0	1	0	2	0
104015	1510	009D03	spri	FBgn0085443					1	0	0	0	1	4	0	0	0	0	0	0	0	2	0	0	0	0	0	0	0	0	0	0	0	0	0	0	0	0	0	0	0	0	0	0	0	0	0	0	0
104016	1511	014B12	CG32579	FBgn0052579					1	1	1	1	0	1	0	0	0	0	1	1	0	1	0	0	0	0	0	1	2	0	0	0	0	0	2	0	0	0	0	0	1	1	0	0	0	0	0	0	0
104018	1514	018A03	RhoGAP18B	FBgn0261461					0	0	1	0	0	0	0	0	0	0	0	0	0	0	0	0	0	0	0	0	0	0	0	0	0	0	0	0	0	0	0	0	0	0	0	1	0	1	0	2	0
104019	1526	006C12	CG14438	FBgn0029899					0	0	1	0	0	0	0	0	0	0	0	0	0	0	0	0	0	0	0	0	0	0	0	0	0	0	0	0	0	0	0	0	0	2	0	0	1	0	0	0	0
104022	1536	054F01	olf186-F	FBgn0041585					0	0	1	0	0	0	0	0	0	0	0	0	0	0	0	0	0	0	0	0	0	0	0	0	0	0	0	0	0	0	0	0	0	0	0	0	0	0	0	0	0
104024	1543	043B03	so	FBgn0003460					1	0	1	0	1	0	0	0	0	0	0	0	0	0	0	0	0	0	0	0	0	0	0	0	0	0	0	0	0	0	0	0	0	0	0	0	0	0	0	0	0
104029	1556	034D01	CG31814	FBgn0051814					1	1	0	0	1	1	0	0	0	0	0	0	0	0	0	0	0	0	0	0	0	2	0	0	0	0	0	2	0	0	0	0	0	0	0	0	0	0	0	0	0
104033	1573	022D01	tho2	FBgn0031390	CG11723	FBgn0031391	CG7261	FBgn0027509	1	1	1	1	0	0	0	0	0	0	1	1	0	0	0	0	0	0	0	1	1	0	0	0	0	0	1	0	0	0	0	0	0	1	1	0	1	0	3	0	1
104034	1574	050C005	stj	FBgn0261041					1	1	0	0	1	1	0	0	0	0	0	1	0	0	0	0	0	0	0	0	0	0	0	0	1	1	0	0	0	0	0	0	0	0	0	0	0	0	0	0	0
104038	1585	061B02	CG34099	FBgn0083992	CG34140	FBgn0083976	CG6851	FBgn0027786	1	1	1	0	1	0	0	0	0	0	1	0	0	0	0	0	0	0	0	2	0	0	1	0	0	0	0	0	0	0	0	0	0	2	0	0	0	0	1	0	0
104039	1586	066D09	Zasp66	FBgn0035917					1	1	1	0	1	1	0	0	1	0	0	0	0	0	0	0	0	0	0	0	0	0	0	0	0	0	1	0	1	0	0	0	0	0	0	0	1	1	0	0	0
104044	1604	089B03	Mhcl	FBgn0026059					0	1	1	0	0	0	0	0	0	0	0	0	0	0	0	0	0	0	0	0	0	0	1	0	0	0	1	0	0	0	0	0	0	0	0	0	0	0	0	0	0
104045	1606	069E02	Atg1	FBgn0260945					1	0	1	0	1	1	0	0	1	0	0	0	2	1	1	0	0	0	0	0	0	0	0	0	0	0	0	0	0	0	0	0	0	0	0	0	0	0	0	0	0
104048	1611	062E05	Spn	FBgn0010905					1	1	0	0	1	0	0	0	0	0	1	1	0	0	0	0	0	0	0	0	0	0	0	0	1	0	0	0	0	0	0	0	0	0	0	0	0	0	0	0	0
104050	1613	073E01	Exn	FBgn0261547					0	1	0	0	0	0	0	0	0	0	0	0	0	0	0	0	0	0	0	0	0	0	0	0	1	1	0	2	0	0	0	0	0	0	0	0	0	0	0	0	0
104052	1617	011E08	HDAC4	FBgn0041210					1	0	0	0	0	0	1	1	0	0	0	0	0	0	0	0	0	0	0	0	0	0	0	0	0	0	0	0	0	0	0	0	0	0	0	0	0	0	0	0	0
104053	1618	005A13	crossveinless	FBgn0000394	CG3160	FBgn0029789	CG3149	FBgn0027564	1	1	1	1	0	0	0	0	0	0	1	0	0	0	0	0	0	0	0	0	2	0	0	1	0	0	0	0	0	0	0	0	0	1	0	0	1	0	1	0	0
104054	1622	001E01	CG42259	FBgn0259144	CG14629	FBgn0040398			0	0	1	0	0	0	0	0	0	0	0	0	0	0	0	0	0	0	0	0	0	0	0	0	0	0	0	0	0	0	0	0	0	0	0	0	0	0	0	0	0
104055	1624	037E02-037E03	traffic jam	FBgn0000964	CG10026	FBgn0032785			1	1	0	0	1	1	0	0	0	0	0	0	0	0	0	0	0	0	0	0	0	2	0	0	0	0	0	0	0	0	0	1	0	0	0	0	0	0	0	0	0
104056	1625	052D01-052D02	sli	FBgn0003425					0	0	0	0	0	0	0	0	0	0	0	0	0	0	0	0	0	0	0	0	0	0	0	0	0	0	0	0	0	0	0	0	0	0	0	0	0	0	0	0	0
104057	1629	059E04	Pi3K59F	FBgn0015277	_PS5	FBgn0034880	CG30184	FBgn0050184	1	1	1	1	4	4	0	0	0	0	0	1	0	2	0	0	0	0	0	0	0	2	0	0	1	0	0	2	0	0	0	0	0	0	0	1	0	1	0	2	0
104058	1630	038E03	CG1864	FBgn0014859	CG9316	FBgn0032878			0	1	1	0	0	0	0	0	0	0	0	0	0	0	0	0	0	0	0	0	0	2	0	0	0	0	2	2	0	0	0	1	0	0	0	0	0	1	0	2	0
104061	2006	046A01	Uba1	FBgn0023143					1	1	1	0	1	4	0	0	0	0	0	0	0	0	0	0	0	0	0	0	0	2	1	0	0	0	0	2	0	0	0	1	0	0	0	0	0	1	0	2	0
104062	2010	026A09-026B01	chic	FBgn0000308	eIF-4a	FBgn0001942	ifc	FBgn0001941	1	1	1	0	1	1	0	0	0	0	0	0	0	0	0	0	0	0	0	1	1	0	0	0	0	0	1	0	0	0	0	0	0	1	1	0	1	0	1	0	0
104063	2011	083B06	Spec2	FBgn0044823					1	1	1	1	0	0	0	0	0	0	1	1	0	0	0	0	0	0	1	1	0	0	0	0	0	0	0	0	0	0	0	0	1	1	0	0	0	0	0	0	0
104065	2028	086C06	Art1	FBgn0037834					0	0	1	1	0	0	0	0	0	0	0	0	0	0	0	0	0	0	0	0	0	0	0	0	0	0	0	0	0	0	0	0	1	1	0	0	0	0	0	0	0
104066	2035	082E07	corto	FBgn0010313					1	1	1	0	0	0	0	0	0	0	1	1	0	0	0	0	0	0	0	1	0	0	0	0	1	0	1	0	0	0	0	0	0	1	1	0	1	0	3	0	0
104077	2071	001B14	Hmt4-20	FBgn0025639					1	0	1	1	1	1	0	0	0	0	1	1	1	1	0	0	0	0	0	0	0	0	0	0	0	0	0	0	0	0	0	0	0	1	1	0	1	0	1	0	0
104078	2073	001B06	svr	FBgn0004648					1	0	1	0	1	1	0	0	0	0	0	0	0	0	0	0	0	0	0	0	0	0	0	0	0	0	0	0	0	0	0	0	0	0	0	0	0	0	0	0	0
104079	2076	003B05	kirre	FBgn0028369					1	1	1	1	1	1	0	0	0	0	1	1	1	1	0	0	0	0	1	1	0	0	0	0	0	0	0	0	0	0	0	0	1	1	0	0	0	0	0	0	0
104080	2077	050C09	AGO1	FBgn0262739					0	1	1	1	0	0	0	0	0	0	0	0	0	0	0	0	0	0	0	0	1	2	0	0	0	0	1	2	0	0	1	0	0	0	0	1	1	1	2	2	0
104081	2078	083B04	exba	FBgn0250753					1	1	1	0	0	0	0	0	0	0	1	1	0	0	0	0	0	0	0	0	0	0	0	0	0	0	0	2	0	0	0	0	0	0	0	0	0	1	0	2	0
104082	2084	026F001	CG11050	FBgn0031836					1	1	1	0	1	1	0	0	0	0	0	0	0	1	0	0	0	0	0	0	1	2	0	0	0	0	1	2	0	0	0	0	0	0	0	1	0	0	3	2	0
104083	2088	96A13	atl	FBgn0039213					1	1	1	1	0	0	0	0	0	0	1	1	0	0	0	0	0	0	0	0	0	2	0	0	0	1	0	2	0	0	0	0	0	2	0	0	0	0	0	0	0
104084	2090	042C03	Adf1	FBgn0000054					1	1	1	1	1	1	1	0	0	0	1	1	2	2	0	0	0	0	1	1	0	0	0	0	0	0	0	0	0	0	0	0	1	1	0	0	0	0	0	0	0
104086	2096	75E01	HipHop	FBgn0036815	Cat	FBgn0000261	CG14073	FBgn0036814	1	1	1	1	1	1	0	0	0	0	1	1	1	1	0	0	0	0	0	1	0	0	1	0	0	0	2	0	0	0	0	0	0	1	0	0	0	0	1	0	0
104091	2104	014F02	Nup153	FBgn0061200					0	0	1	0	0	0	0	0	0	0	0	0	0	0	0	0	0	0	0	0	0	0	0	0	0	0	0	0	0	0	0	0	0	0	0	0	0	0	0	0	0
104092	2112	018F03	pico	FBgn0261811					1	1	1	0	0	0	0	0	0	0	0	0	2	0	0	0	0	0	0	0	0	0	0	0	1	0	0	0	0	0	0	0	0	2	0	0	1	0	1	0	0
104093	2113	025E03	NG						0	1	1	0	0	0	0	0	0	0	0	0	0	0	0	0	0	0	0	0	0	0	0	0	0	0	1	1	0	0	0	0	0	0	0	0	0	0	0	0	0
104096	2119	001A03-001A04	CG3777	FBgn0024989					0	0	1	0	0	0	0	0	0	0	0	0	0	0	0	0	0	0	0	0	0	0	0	0	0	0	0	0	0	0	0	0	0	0	0	0	0	0	0	0	0
104110	2161	097F01	mrt	FBgn0039507	CG3368	FBgn0039508			1	1	0	0	1	1	0	0	0	0	1	1	1	1	0	0	0	0	0	1	0	0	1	0	0	0	1	0	0	0	0	0	0	0	0	0	0	0	0	0	0
104111	2162	069E02-073A10	Rpn12	FBgn0028693					1	1	1	0	4	4	0	0	0	0	0	0	0	1	0	0	0	0	0	0	0	0	0	1	0	0	0	2	0	0	0	0	0	0	0	0	0	0	0	2	0
104112	2167	060C02	CG3363	FBgn0034987	Nop60B	FBgn0259937			1	1	1	1	1	1	0	0	0	0	0	0	0	2	0	0	0	0	0	0	0	2	0	0	0	0	1	2	0	0	0	1	0	0	0	1	0	1	0	2	0
104113	2169	011B09	Tis11	FBgn0011837					1	0	1	1	1	1	0	0	0	0	0	1	0	2	0	0	0	0	0	0	0	0	0	0	0	0	0	0	0	0	0	0	1	1	0	0	0	0	0	0	1
104114	2170	003E03	Mnt	FBgn0023215	Parg	FBgn0023216			1	1	1	1	0	0	0	0	0	0	1	1	0	0	0	0	0	0	0	1	0	0	0	0	0	0	0	0	1	0	0	0	0	0	0	0	0	0	0	0	0
104115	2178	051F11	Pms2	FBgn0011660					1	1	1	1	0	4	0	0	0	0	1	1	0	2	0	0	0	0	0	0	0	2	0	0	1	0	1	2	0	0	0	1	0	0	0	0	0	1	0	2	0
104116	2179	02D04	CG3835	FBgn0023507					1	1	1	1	0	0	0	0	0	0	1	0	0	0	0	0	0	0	0	1	1	0	0	0	1	0	1	0	0	0	0	0	0	1	0	0	0	0	1	0	0
104117	2182	045D05	Pdk	FBgn0017558					1	1	0	0	1	1	0	0	0	0	1	1	0	1	0	0	0	0	0	0	0	2	0	0	0	1	0	2	0	0	0	0	0	0	0	0	0	0	0	0	0
104120	2187	094E05	cnc	FBgn0262975					1	1	1	1	1	0	0	0	0	0	0	0	0	0	0	0	0	0	0	0	0	0	0	0	0	0	1	0	0	0	0	0	0	1	0	0	1	1	1	0	0
104122	2192	085A05	CG8032	FBgn0037606	p	FBgn0086679	bel	FBgn0000171	1	1	0	0	1	4	0	0	0	0	0	0	0	2	0	0	0	0	0	0	0	2	0	0	0	0	1	2	0	0	0	0	0	0	0	0	0	0	0	0	0
104124	2204	048D01	Ef1alpha48D	FBgn0000556	ERp60	FBgn0033663			0	1	0	0	0	0	0	0	0	0	0	0	0	0	0	0	0	0	1	1	0	0	0	0	0	0	0	0	0	0	0	0	0	0	0	0	0	0	0	0	0
104125	2210	059D09	eIF2B-delta	FBgn0034858	CG30414	FBgn0050414	CG30415	FBgn0250838	1	1	1	0	0	0	0	0	0	0	1	1	0	0	0	0	0	0	0	2	1	0	0	0	0	0	1	0	0	0	0	0	0	2	1	0	0	0	1	0	0
104126	2212	013A01	CG9009	FBgn0027601	CG9030	FBgn0030599			1	1	1	0	0	0	0	0	0	0	1	1	0	1	0	0	0	0	0	2	1	0	0	0	0	0	1	0	0	0	0	0	0	1	1	0	1	0	0	0	0
104133	2237	042A11	EcR	FBgn0000546					1	1	1	0	1	1	0	0	0	0	0	0	2	1	0	0	0	0	0	0	0	2	0	0	0	0	0	2	0	0	0	0	0	0	0	1	0	1	0	1	0
104136	2245	068C02	CG6175	FBgn0036152	CG7573	FBgn0036153			1	1	1	1	0	0	0	0	0	0	1	1	0	0	0	0	0	0	0	0	1	1	0	0	0	0	1	1	0	0	0	0	0	0	0	0	1	1	0	2	0
104137	2248	027C07	SA	FBgn0020616	CG10158	FBgn0031871	ihog	FBgn0031872	1	1	0	0	0	4	0	0	0	0	0	1	0	2	0	0	0	0	0	0	0	2	0	0	0	0	0	2	0	0	0	1	0	0	0	0	0	0	0	0	0
104138	2251	020F01	fog	FBgn0000719	CG42346	FBgn0259677			1	1	1	1	0	0	0	0	0	0	1	1	0	0	0	0	0	0	0	0	0	2	0	0	1	0	0	2	0	0	0	0	0	0	0	0	0	1	0	0	0
104139	2252	062A03	pUf68	FBgn0028577					1	1	1	1	0	0	0	0	0	0	1	1	0	0	0	0	0	0	0	0	0	2	0	0	0	0	0	2	0	0	0	0	0	0	0	0	0	1	0	2	0
104140	2253	003A08	sgg	FBgn0003371					1	1	1	0	0	0	0	0	0	0	1	1	0	1	1	1	0	0	0	0	0	2	0	0	0	0	1	2	0	0	0	0	0	0	0	0	0	0	3	1	0
104141	2255	087B010	CG5641	FBgn0038046					1	1	1	0	0	0	0	0	0	0	1	1	0	0	0	0	0	0	0	0	0	2	0	0	0	0	0	2	0	0	0	0	0	0	0	0	0	0	0	0	0
104143	2266	039B03	CG8678	FBgn0032935					1	1	0	0	1	1	0	0	0	0	0	0	0	0	0	0	0	0	0	0	0	2	0	0	0	0	0	2	0	0	0	1	0	0	0	0	0	0	0	0	0
104144	2268	029F07	Rcd-1r	FBgn0032089					1	1	1	1	1	4	0	0	0	0	0	0	0	2	0	0	0	0	0	0	0	2	0	0	0	0	0	2	0	0	0	0	0	0	0	0	0	0	0	0	0
104145	2269	049E07	Su(z)2	FBgn0008654					1	1	0	0	1	1	1	1	0	0	0	1	0	0	0	0	0	0	0	0	0	2	0	0	0	0	0	2	0	0	0	0	0	0	0	0	0	0	0	0	0
104150	2285	060E05	Ance-5	FBgn0035076	NaCP60E	FBgn0085434			1	0	0	0	0	1	0	1	0	1	0	0	0	2	0	0	0	0	0	0	0	0	0	0	0	0	0	0	0	0	0	0	0	0	0	0	0	0	0	0	0
104173	2364	040A06	tsh	FBgn0003866					1	1	1	1	2	2	0	0	0	0	0	0	0	0	0	0	0	0	0	1	1	0	0	0	0	0	0	0	0	0	0	0	0	1	1	0	1	0	0	0	0
104174	2366	060D09	CG3565	FBgn0035034					1	1	1	1	0	0	0	0	0	0	1	1	0	0	0	0	0	0	0	0	0	2	0	0	0	0	0	2	0	0	0	1	0	0	0	1	0	1	0	2	0
104175	2367	033F03	spict	FBgn0032451					1	1	1	1	1	4	0	0	0	0	0	0	0	2	0	0	0	0	0	0	0	0	0	2	0	1	0	2	0	0	0	1	0	1	1	0	1	0	3	0	0
104176	2370	009B01	CG34104	FBgn0083940					1	1	1	0	1	4	0	0	0	0	1	1	1	2	0	0	0	0	0	0	1	2	0	0	0	0	1	1	0	0	0	0	1	1	0	0	0	0	3	0	1
104177	2373	009F01	sesB	FBgn0003360					1	1	1	1	0	0	0	0	0	0	1	1	0	0	0	0	0	0	1	1	0	0	0	0	0	0	0	0	0	0	0	0	1	1	0	0	0	0	0	0	0
104178	2375	093B08	Mvl	FBgn0011672					0	1	1	1	0	0	0	0	0	0	0	0	0	0	0	0	0	0	0	2	1	0	0	0	0	0	1	0	0	0	0	0	0	0	0	1	1	1	0	2	0
104179	2376	082B01	CG9853	FBgn0086605	lost	FBgn0263594			1	1	1	1	1	1	0	0	0	0	1	1	0	1	0	0	0	0	0	1	2	0	0	0	0	0	1	0	0	0	1	0	0	1	1	0	1	0	2	0	0
104182	2382	057D01-057D02	CG4302	FBgn0027073	CG15661	FBgn0034605			1	1	1	0	1	4	0	0	0	0	1	1	0	2	0	0	0	0	0	0	0	0	0	0	0	0	0	2	0	0	0	1	0	0	0	0	0	0	0	0	0
104184	2388	013F01	sd	FBgn0003345	PGRP-LE	FBgn0030695	CG8509	FBgn0030696	1	1	1	1	1	1	1	0	0	0	0	0	0	1	0	0	0	0	0	2	0	0	0	0	0	0	0	0	0	0	0	0	0	1	0	0	1	0	3	0	0
104185	2392	095C13	Rps19b	FBgn0039129	CG5854	FBgn0039130	Pros26.4	FBgn0015282	0	0	1	0	0	0	0	0	0	0	0	0	0	0	0	0	0	0	0	0	0	0	0	0	0	0	0	0	0	0	0	0	0	0	0	0	0	1	0	0	0
104191	2404	031C06	CG5604	FBgn0032208					1	0	1	1	4	0	0	0	0	0	0	0	0	0	0	0	0	0	0	0	0	0	0	0	0	0	0	0	0	0	0	0	0	0	0	0	0	0	0	0	0
104206	2455	099F10	Rpt6R	FBgn0039788	CG9717	FBgn0039789	CG31019	FBgn0051019	0	1	0	0	0	0	0	0	0	0	0	0	0	0	0	0	0	0	0	0	0	2	0	0	0	0	0	2	0	0	0	0	0	0	0	0	0	0	0	0	0
104208	2460	085CXX	CG17702	FBgn0040003	CG40209	FBgn0058209	CG40214	FBgn0085586	1	1	1	0	4	1	1	0	0	0	0	0	2	1	0	0	0	0	0	2	0	0	0	0	0	0	0	0	0	0	0	0	0	0	0	1	0	1	0	2	0
104210	2469	012C02	CG32626	FBgn0052626					1	0	1	0	4	4	0	0	0	0	0	0	0	2	0	0	0	0	0	0	0	0	0	0	0	0	0	0	0	0	0	0	0	0	0	0	0	0	0	0	0
104211	2472	082D01	CG31531	FBgn0051531					1	0	1	1	1	1	0	0	0	0	0	0	0	0	0	0	0	0	0	0	0	0	0	0	0	0	0	0	0	0	0	0	0	0	0	0	0	0	0	2	0
104213	2475	064A01	CG12605	FBgn0035481					1	1	1	0	1	1	0	0	0	0	0	0	0	1	0	0	0	0	0	2	0	0	1	0	0	0	2	0	0	0	0	0	0	0	1	0	1	0	3	3	0
104215	2486	099B10	CG7609	FBgn0027518					1	1	1	0	4	1	0	0	1	0	1	1	0	0	0	0	0	0	0	1	1	0	0	0	0	0	1	0	0	0	0	0	0	2	1	0	1	0	1	0	0
104219	2492	008D06	lozenge	FBgn0002576					0	0	0	0	0	0	0	0	0	0	0	0	0	0	0	0	0	0	0	0	0	0	0	0	0	0	0	0	0	0	0	0	0	0	0	0	0	0	0	0	0
104220	2494	052B03	CG42524	FBgn0260429					1	0	1	0	1	1	0	0	0	0	0	0	0	0	0	0	0	0	0	0	0	0	0	0	0	0	0	0	0	0	0	0	0	0	0	0	0	0	0	2	0
104222	2501	043D03	CG1600	FBgn0033188	Cyt-b5	FBgn0033189	CG2137	FBgn0033190	0	1	1	0	0	0	0	0	0	0	0	0	0	0	0	0	0	0	1	1	0	0	0	0	0	0	0	0	0	0	0	0	0	1	1	0	1	0	2	0	0
104223	2505	096B09	Trf4-2	FBgn0039251	CG11120	FBgn0039250	CG11168	FBgn0039249	0	1	1	0	0	0	0	0	0	0	0	0	0	0	0	0	0	0	0	2	0	0	0	0	0	0	0	0	0	0	0	0	0	2	0	0	0	0	1	0	0
104224	2509	011F01	CG1640	FBgn0030478					1	1	1	0	0	0	0	0	0	0	0	0	2	0	0	0	0	0	0	2	1	0	0	0	0	0	1	0	0	0	0	0	0	2	0	0	0	0	1	0	0
104225	2510	085D11	CG43674	FBgn0263749					0	0	1	0	0	0	0	0	0	0	0	0	0	0	0	0	0	0	0	0	0	0	0	0	0	0	0	0	0	0	0	0	0	0	0	0	0	1	0	0	0
104226	2514	013B01	CG9095	FBgn0030617					1	0	1	0	0	0	0	0	0	0	1	0	0	0	0	0	0	0	0	0	0	0	0	0	0	0	0	0	0	0	0	0	0	0	0	0	0	1	0	0	0
104227	2521	073B01	CG4098	FBgn0036648					1	1	1	1	0	0	0	0	0	0	1	1	0	0	0	0	0	0	0	2	1	0	0	0	0	0	1	0	0	0	0	0	0	2	0	0	0	0	1	0	0
104230	2527	059B02	blw	FBgn0011211					1	1	1	1	0	0	0	0	0	0	1	1	0	0	0	0	0	0	1	1	0	0	0	0	0	0	0	0	0	0	0	0	0	1	1	0	1	0	1	0	0
104244	2576	054C03	eIF3-S9	FBgn0034237	Patronin	FBgn0263197			0	0	0	0	0	0	0	0	0	0	0	0	0	0	0	0	0	0	0	0	0	0	0	0	0	0	0	0	0	0	0	0	0	0	0	0	0	0	0	0	0
104245	2577	049F04	Spt-1	FBgn0086532	Glaz	FBgn0033799			1	1	1	1	0	0	0	0	0	0	1	1	0	0	0	0	0	0	0	0	2	0	0	0	0	0	2	0	0	0	0	0	0	1	1	0	1	0	1	0	0
104247	2581	024C03	Bowl	FBgn0004893	CG31772	FBgn0051772			1	1	1	0	1	1	0	0	0	0	0	0	1	1	0	0	0	0	0	0	0	0	0	0	0	0	0	0	0	0	1	1	0	0	0	0	0	0	3	0	1
104251	2592	095F01	CG6204	FBgn0039165					1	1	0	0	1	1	0	0	0	0	0	0	0	0	0	0	0	0	1	1	0	0	0	0	0	0	0	0	0	0	0	0	0	0	0	0	0	0	0	0	0
104256	2604	021B07	CG17078	FBgn0086855					1	1	1	1	1	1	0	0	0	0	1	1	0	1	0	0	0	0	1	1	0	0	0	0	0	0	0	0	0	0	0	0	1	1	0	0	0	0	0	0	0
104257	2606	092C01	psidin	FBgn0243511					0	1	1	0	0	0	0	0	0	0	0	0	0	0	0	0	0	0	0	0	0	2	0	0	0	0	0	0	0	0	0	0	0	0	0	1	0	1	1	2	0
104258	2608	100D01	NG						1	1	1	0	0	4	0	0	0	0	0	1	0	0	0	0	0	0	0	0	0	2	0	0	0	0	1	2	0	0	0	0	0	0	0	1	0	1	0	2	0
104263	2623	051D06	pcs	FBgn0033988					1	1	1	1	1	1	0	0	0	0	0	1	1	1	0	0	0	0	0	1	1	0	0	0	0	0	1	0	0	0	0	0	0	1	1	0	1	0	3	0	0
104264	2625	003D03	CG12535	FBgn0029657					0	0	0	1	0	0	0	0	0	0	0	0	0	0	0	0	0	0	0	0	0	0	0	0	0	0	0	0	0	0	0	0	0	0	0	0	0	0	0	0	0
104276	2652	087D07	CG7518	FBgn0038108					1	1	0	0	0	0	0	0	0	0	0	1	0	0	0	0	0	0	0	0	0	0	0	0	0	0	0	2	0	0	0	0	0	0	0	0	0	0	0	0	0
104277	2657	067B01	Hsp23	FBgn0001224	Hsp67Ba	FBgn0001227	Hsp27	FBgn0001226	1	1	1	1	1	1	0	0	0	0	0	0	0	1	0	0	0	0	0	0	0	2	0	0	1	0	2	2	0	0	0	0	0	0	0	0	1	1	1	1	1
104278	2662	082F08	Hph	FBgn0086689					0	1	1	0	0	0	0	0	0	0	0	0	0	0	0	0	0	0	0	0	0	0	1	1	0	0	2	2	0	0	0	0	0	0	0	0	0	1	0	2	0
104280	2664	057A06	qsm	FBgn0028622					1	1	1	0	4	4	0	0	0	0	0	0	0	2	0	1	0	1	0	2	2	0	0	0	0	0	2	0	0	0	0	0	0	2	0	0	0	1	0	0	0
104281	2666	096B19	CG11791	FBgn0039266					1	1	1	1	0	0	0	0	0	0	1	1	0	0	0	0	0	0	0	1	1	0	0	0	0	0	1	0	0	0	0	0	0	1	0	0	1	0	1	0	0
104283	2673	67B4-67B5	CG3967	FBgn0035989	Shc	FBgn0015296			1	1	1	1	1	1	0	0	0	0	0	0	0	0	0	0	0	0	0	1	2	0	0	0	0	0	2	0	0	0	0	0	0	1	1	0	1	0	1	0	0
104284	2679	031D04	CG5385	FBgn0032215					1	1	1	0	1	0	0	0	0	0	0	0	1	0	0	0	0	0	0	0	0	2	0	0	0	0	0	2	0	0	0	0	0	0	0	0	0	1	0	2	0
104285	2682	092D09	cic	FBgn0262582					1	1	1	0	0	0	0	0	0	0	1	1	0	0	0	0	0	0	0	1	1	0	0	0	1	0	1	0	0	0	0	0	0	1	0	0	1	0	1	0	0
104286	2683	060E05	CG2811	FBgn0035082	CG2811	FBgn0035082	Tina-1	FBgn0035083	1	1	1	0	4	4	0	0	0	0	0	1	2	1	0	1	0	1	0	0	0	2	0	0	0	0	0	2	0	0	0	0	0	0	0	1	0	1	0	2	0
104287	2684	089B14-089C07	tara	FBgn0040071	bor	FBgn0040237			1	0	0	0	1	1	1	1	0	0	0	0	0	0	0	0	0	0	0	0	0	0	0	0	0	0	0	0	0	0	0	0	0	0	0	0	0	0	0	0	0
104288	2686	068D06	Pi3K68D	FBgn0015278					1	1	1	1	0	0	0	0	0	0	1	1	0	0	0	0	0	0	0	2	0	0	0	0	0	0	0	0	0	0	0	0	0	2	0	0	0	0	0	0	0
104290	2690	007B06	CHES-1-like	FBgn0029504					1	1	1	0	0	0	0	0	0	0	1	1	0	1	0	0	0	0	0	2	1	0	0	0	0	0	1	0	0	0	0	0	0	1	0	0	0	0	3	0	0
104292	2694	083C01	Sym	FBgn0037371					1	1	1	0	1	1	0	0	0	0	0	0	0	1	0	0	0	0	0	2	1	0	0	0	0	0	2	0	0	0	1	0	0	1	0	0	1	0	1	0	0
104293	2696	049E06	Psc	FBgn0005624					1	1	1	0	0	0	0	0	0	0	0	0	1	1	0	0	0	0	0	2	0	0	0	0	0	0	0	0	0	0	0	0	0	2	0	0	0	0	0	0	0
104294	2700	021B03	CG31974	FBgn0051974					1	1	1	1	0	0	0	0	0	0	1	1	0	0	0	0	0	0	0	0	0	1	0	0	0	0	0	2	1	1	0	1	0	0	0	0	0	0	3	3	0
104296	2702	039C01	Hr39	FBgn0261239	l(2)k14505	FBgn0021856	CG8671	FBgn0032938	1	1	1	0	1	1	0	0	0	0	0	0	0	0	0	0	0	0	0	0	0	0	0	0	0	0	0	2	0	0	0	0	0	0	0	0	0	0	0	2	0
104300	2712	065E09	Neos	FBgn0024542					1	0	1	0	1	4	0	0	0	0	0	0	0	2	0	0	0	0	0	0	0	0	0	0	0	0	0	0	0	0	0	0	0	0	0	1	0	1	0	2	0
104301	2729	067E04	A2bp1	FBgn0052062					1	1	1	0	0	0	0	0	0	0	1	1	0	0	0	0	0	0	0	0	0	0	0	0	1	1	0	2	1	1	0	0	0	0	0	0	0	0	0	0	0
104313	2758	011E011	IP3K2	FBgn0085388					1	1	1	1	0	0	0	0	0	0	1	1	0	0	0	0	0	0	0	0	0	2	0	0	0	0	0	2	0	0	0	0	0	0	0	0	0	1	0	2	0
104314	2760	064D05-064D06	CG10590	FBgn0035622	mthl2	FBgn0035623	Eaf6	FBgn0035624	1	1	1	1	0	1	0	0	0	0	1	1	0	1	0	0	0	0	0	1	2	0	0	0	0	0	2	0	0	0	0	0	1	1	0	0	0	0	0	0	0
104315	2761	007E02	nAcRalpha-7E	FBgn0015519					1	0	1	0	1	4	0	0	0	0	0	0	0	2	0	0	0	0	0	0	0	0	0	0	0	0	0	0	0	0	0	0	0	0	0	0	0	0	0	0	0
104316	2762	064C011	shep	FBgn0052423					1	0	0	0	1	0	0	0	0	0	0	0	0	0	0	0	0	0	0	0	0	0	0	0	0	0	0	0	0	0	0	0	0	0	0	0	0	0	0	0	0
104317	2763	069B03	Ncc69	FBgn0036279	Obp69A	FBgn0011279			1	1	1	1	4	1	0	0	0	0	1	1	0	1	0	0	0	0	0	1	0	0	0	0	1	0	2	0	0	0	0	0	0	2	0	0	0	0	0	0	0
104318	2773	014A08	Tob	FBgn0028397					0	1	0	0	0	0	0	0	0	0	0	0	0	0	0	0	0	0	0	0	0	2	0	0	0	0	0	2	0	0	0	0	0	0	0	0	0	0	0	0	0
104325	2788	038C05	spir	FBgn0003475					0	1	1	0	0	0	0	0	0	0	0	0	0	0	0	0	0	0	0	0	0	0	1	1	0	0	0	0	0	0	0	0	0	0	0	1	1	1	0	2	0
104326	2790	023C01	lilli	FBgn0041111					1	1	1	1	4	1	0	0	0	0	0	0	0	2	0	0	0	0	0	0	2	2	0	0	0	0	0	2	0	0	0	0	0	0	0	0	0	0	0	0	0
104327	2795	049C01	CG42708	FBgn0261625	nemy	FBgn0033765			1	1	0	0	1	1	0	0	0	0	0	0	0	0	0	0	0	0	0	0	0	0	0	0	1	1	2	2	0	0	0	0	0	0	0	0	0	0	0	0	0
104328	2802	074A02	CG7707	FBgn0036703					1	0	0	0	4	4	0	0	0	0	0	0	0	2	0	0	0	0	0	0	0	0	0	0	0	0	0	0	0	0	0	0	0	0	0	0	0	0	0	0	0
104329	2807	065A02	CG10479	FBgn0035656					1	1	1	1	1	1	0	0	0	0	1	1	0	1	0	0	0	0	0	0	0	2	0	0	0	0	0	2	0	0	0	1	0	0	0	0	0	1	0	2	0
104330	2808	017C01	Aats-his	FBgn0027087					1	1	1	1	1	1	1	0	0	0	0	0	0	0	0	0	0	0	0	0	0	2	0	0	0	0	0	2	0	0	0	0	0	0	0	0	0	1	0	2	0
104331	2811	086C07	CG4674	FBgn0037856	CG14696	FBgn0037853			1	0	0	0	1	0	0	0	0	0	0	0	0	0	0	0	0	0	0	0	0	0	0	0	0	0	0	0	0	0	0	0	0	0	0	0	0	0	0	0	0
104350	3036	082D06	Hus1-like	FBgn0026417					1	0	0	0	4	0	0	0	0	0	0	0	0	0	0	0	0	0	0	0	0	0	0	0	0	0	0	0	0	0	0	0	0	0	0	0	0	0	0	0	0
104351	3038	044C04	pdm3	FBgn0261588					1	0	1	0	0	0	0	0	0	0	1	1	0	0	0	0	0	0	0	0	0	0	0	0	0	0	0	0	0	0	0	0	0	0	0	0	0	0	0	0	0
104352	3040	094E07	cnc	FBgn0262975	CG4467	FBgn0039064			0	0	1	1	0	0	0	0	0	0	0	0	0	0	0	0	0	0	0	0	0	0	0	0	0	0	0	0	0	0	0	0	0	0	0	0	0	0	0	0	0
104373	3093	007C04	CG10777	FBgn0029979					1	1	1	1	1	4	0	0	0	0	1	1	0	0	0	0	0	0	0	2	0	0	0	0	0	0	0	0	0	0	0	0	0	0	0	0	0	0	0	0	0
104374	3094	093E10	E2F	FBgn0011766					1	1	1	1	0	4	0	0	0	0	0	0	1	1	0	0	0	0	0	0	0	0	1	0	0	0	1	0	0	0	0	0	0	1	1	0	1	0	1	0	0
104375	3103	082D02	CG9769	FBgn0037270					1	1	1	0	1	4	0	0	0	0	0	2	0	0	0	0	0	0	0	0	0	0	0	0	0	0	0	2	0	0	0	1	0	0	0	0	0	0	0	0	0
104376	3104	071B05	Pdi	FBgn0014002					0	0	0	0	0	0	0	0	0	0	0	0	0	0	0	0	0	0	0	0	0	0	0	0	0	0	0	0	0	0	0	0	0	0	0	0	0	0	0	0	0
104386	3131	047B01	CG11883	FBgn0033538	psq	FBgn0004399			1	1	0	0	1	1	0	0	0	0	0	1	0	2	0	0	0	0	0	0	0	2	0	0	0	1	0	2	0	0	0	0	0	0	0	0	0	0	0	0	0
104391	3144	017B01	CG32548	FBgn0052548	CG32547	FBgn0052547	CG32551	FBgn0052551	0	0	0	0	0	0	0	0	0	0	0	0	0	0	0	0	0	0	0	0	0	0	0	0	0	0	0	0	0	0	0	0	0	0	0	0	0	0	0	0	0
104392	3150	030E01	nAcRalpha-30D	FBgn0032151	FKBP59	FBgn0029174	CG4537	FBgn0032153	1	1	0	0	0	0	0	0	0	0	1	1	0	0	0	0	0	0	0	1	2	0	0	0	0	0	2	0	0	0	0	0	0	0	0	0	0	0	0	0	0
104393	3153	088E08	Su(var)3-9	FBgn0003600					1	1	1	1	4	4	1	1	1	0	0	0	1	2	0	0	0	0	0	0	0	2	0	0	0	0	2	2	0	0	0	0	0	0	0	0	0	1	0	2	0
104394	3156	070A08	flr	FBgn0260049					1	1	1	0	1	1	0	0	0	0	1	1	0	1	0	0	0	0	0	2	1	0	0	0	0	0	1	0	0	0	0	0	0	2	0	0	0	0	0	0	0
104395	3157	050A12	bbc	FBgn0033844					0	0	0	0	0	0	0	0	0	0	0	0	0	0	0	0	0	0	0	0	0	0	0	0	0	0	0	0	0	0	0	0	0	0	0	0	0	0	0	0	0
104396	3162	010A06	Klp10A	FBgn0030268	CG18292	FBgn0030269			0	0	0	1	0	0	0	0	0	0	0	0	0	0	0	0	0	0	0	0	0	0	0	0	0	0	0	0	0	0	0	0	0	0	0	0	0	0	0	0	0
104397	3165	075E02	CG3961	FBgn0036821	CG11637	FBgn0036822			1	1	1	1	1	1	0	0	0	0	0	0	0	0	0	0	0	0	0	0	0	2	1	0	0	0	0	2	0	0	0	0	0	0	0	0	0	1	0	2	0
104400	3177	003F01	CG2947	FBgn0029676	CG32789	FBgn0260484	Crg-1	FBgn0021738	0	0	0	0	0	0	0	0	0	0	0	0	0	0	0	0	0	0	0	0	0	0	0	0	0	0	0	0	0	0	0	0	0	0	0	0	0	0	0	0	0
104402	3181	038E01	CG9328	FBgn0032886	varicose	FBgn0250785			1	1	1	1	0	0	0	0	0	0	1	1	0	0	0	0	0	0	1	1	0	0	0	0	0	0	0	0	0	0	0	0	1	1	0	0	0	0	0	0	0
104405	3191	049F01	CG13323	FBgn0033788	CG13324	FBgn0033789			1	1	1	1	1	1	0	0	0	0	1	1	0	0	0	0	0	0	0	2	0	0	0	0	1	0	0	0	0	0	0	0	0	2	0	0	0	0	0	0	0
104422	3239	003D03	CG12535	FBgn0029657	CG16782	FBgn0029659	CG10801	FBgn0029660	1	1	1	0	0	0	0	0	0	0	1	1	0	0	0	0	0	0	0	0	0	2	0	0	0	0	0	2	0	0	0	1	0	0	0	0	0	0	3	0	0
104423	3243	028D02	CG7102	FBgn0031961					1	1	1	0	0	0	0	0	0	0	1	1	0	0	0	0	0	0	0	2	0	0	0	0	0	0	0	0	0	0	0	0	0	2	0	0	0	0	0	0	0
104425	3248	087F06	rin	FBgn0015778					1	1	1	1	0	0	0	0	0	0	1	1	0	0	0	0	0	0	1	1	0	0	0	0	0	0	0	0	0	0	0	0	1	1	0	0	0	0	0	0	0
104426	3249	009D01	CG2889	FBgn0030206					1	1	1	0	0	0	0	0	0	0	1	1	0	0	0	0	0	0	0	2	1	0	0	0	0	0	1	0	0	0	0	0	0	2	0	0	0	0	0	0	0
104427	3252	086E13	Csk	FBgn0259217					1	1	1	1	1	1	0	0	0	0	0	0	0	1	0	0	0	0	0	1	0	0	0	0	0	0	1	0	0	0	0	0	1	1	0	0	0	0	0	0	0
104429	3257	015F01	baz	FBgn0000163					1	1	1	0	1	1	0	0	0	0	0	0	2	1	0	0	0	0	0	0	2	2	0	0	0	0	1	2	0	0	1	0	0	2	0	0	0	0	0	0	0
104430	3258	002B17	Hr4	FBgn0264562					1	1	1	0	1	1	1	1	0	0	0	0	0	0	0	0	0	0	0	2	0	0	0	0	0	0	0	0	0	0	0	0	0	1	0	0	0	0	0	0	0
104433	3263	006E04	CG14430	FBgn0029927	innexin 7	FBgn0027106			1	1	0	0	1	1	1	1	0	0	0	0	1	1	0	0	0	0	1	1	0	0	0	0	0	0	0	0	0	0	0	0	0	0	0	0	0	0	0	0	0
104434	3268	049B07	Amph	FBgn0027356					1	1	1	1	0	0	0	0	0	0	1	1	0	0	0	0	0	0	0	1	0	0	1	0	0	0	2	0	0	0	0	0	1	1	0	0	0	0	0	0	0
104438	3280	099F08	tmod	FBgn0082582					1	1	1	0	0	0	0	0	0	0	1	1	0	0	0	0	0	0	0	0	0	0	0	0	1	0	0	0	0	0	0	0	0	2	0	0	0	0	0	0	0
104455	3327	043A04	DSCAM	FBgn0033159					1	0	0	0	0	0	0	0	0	0	1	1	0	0	0	0	0	0	0	0	0	0	0	0	0	0	0	0	0	0	0	0	0	0	0	0	0	0	0	0	0
104456	3330	018D03	CG14207	FBgn0031037					1	0	0	0	0	0	0	0	0	0	1	1	0	0	0	0	0	0	0	0	0	0	0	0	0	0	0	0	0	0	0	0	0	0	0	0	0	0	0	0	0
104459	3333	063A03	CG2162	FBgn0035388					1	0	1	0	1	1	0	0	0	0	1	1	0	1	0	0	0	0	0	0	0	0	0	0	0	0	0	0	0	0	0	0	0	2	0	0	1	0	1	0	0
104460	3337	076A1	fz2	FBgn0016797					0	0	0	0	0	0	0	0	0	0	0	0	0	0	0	0	0	0	0	0	0	0	0	0	0	0	0	0	0	0	0	0	0	0	0	0	0	0	0	0	0
104461	3338	005D01	Grip	FBgn0029830	fs(1)M3	FBgn0005390			1	1	1	1	0	0	0	0	0	0	1	1	0	0	0	0	0	0	0	0	0	2	0	0	0	0	0	2	0	0	0	0	0	1	1	0	1	0	1	0	0
104462	3341	038F01	CG9331	FBgn0032889					1	1	1	1	0	0	0	0	0	0	1	1	0	0	0	0	0	0	0	2	0	0	0	0	0	0	0	0	0	0	1	0	0	0	0	0	0	1	0	2	0
[truncated: 17 more columns]
